# Supplementary material for: Synthesis and properties of chemiluminescent acridinium esters with different N-alkyl groups
Source: Royal Society of Chemistry journal article supplement (doi:10.1039/c5ra00334b), 2015-01-01
Supplement: c5ra00334b1.pdf [file c5ra00334b1.pdf]

**Synthesis and properties of chemiluminescent acridinium esters with different N-Alkyl  
groups**

Supplementary Material

Shenliang Wang and Anand Natrajan\*

*Siemens Healthcare Diagnostics*

*Advanced Technology and Pre-Development*

*333 Coney Street*

*East Walpole, MA 02032*

\* Author to whom correspondence should be directed.

E-mail: [anand.natrajan@siemens.com](mailto:anand.natrajan@siemens.com)

Phone: 1-508-660-4582

Fax: 1-508-660-4591

## Table of Contents

1. Figures S1-S13: HPLC traces, <sup>1</sup>H-NMR spectra and HRMS (high resolution mass spectra) of synthetic intermediates and acridinium esters. Analytical HPLC was performed with a Phenomenex, Kinetex C<sub>18</sub>, 5 micron, 150 x 4.6 mm column and using a 20 minute gradient of 10% → 100% acetonitrile/water (each with 0.05% trifluoroacetic acid, TFA) at a flow rate of 1 mL/min and UV detection at 260 nm.
2. Figure S14a-f: Chemiluminescence emission spectra of acridinium esters **1a-6a**.
3. Figure S15: Chemiluminescence stability of BSA conjugates of **1b-6b**.
4. Tables S1 and S2: Fractional non-specific binding (fNSB) experimental data.

## Compound 8

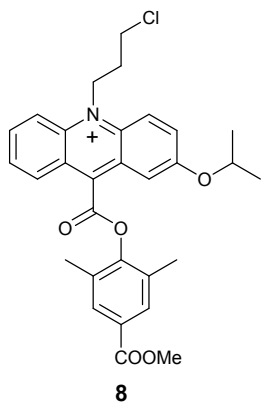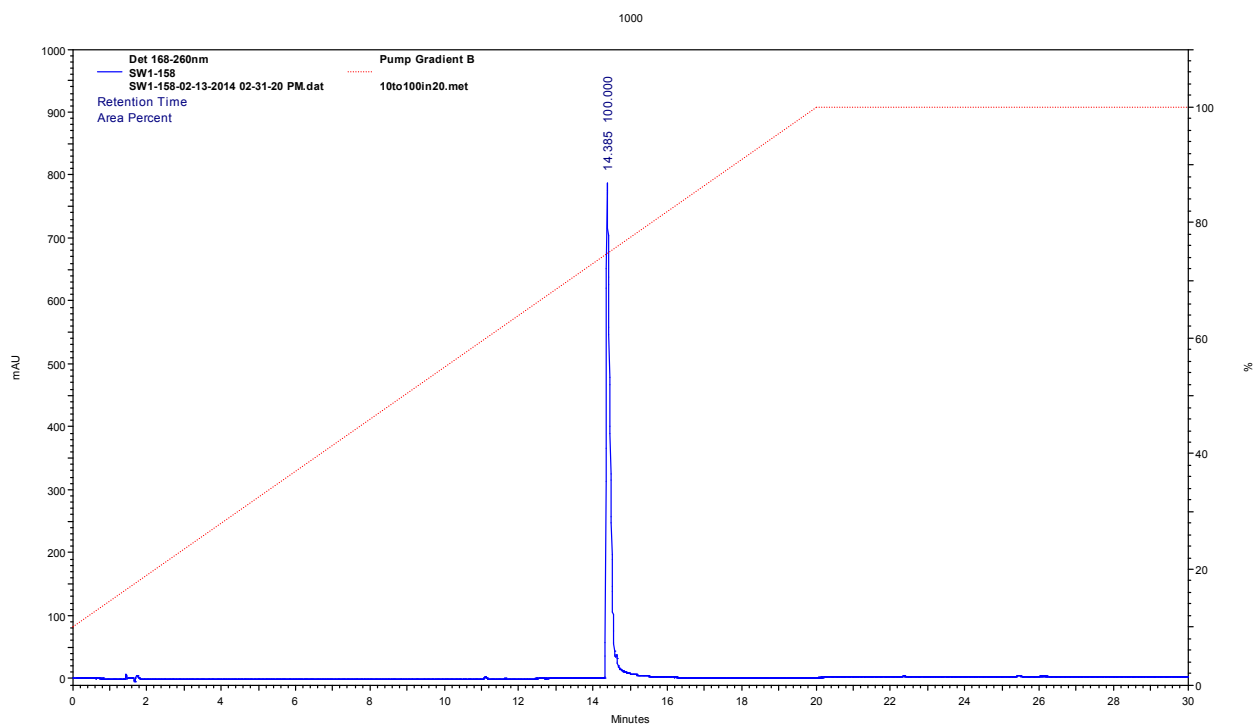

Figure S1a. HPLC trace of compound 8.

# Compound 8

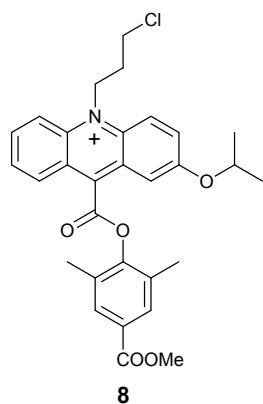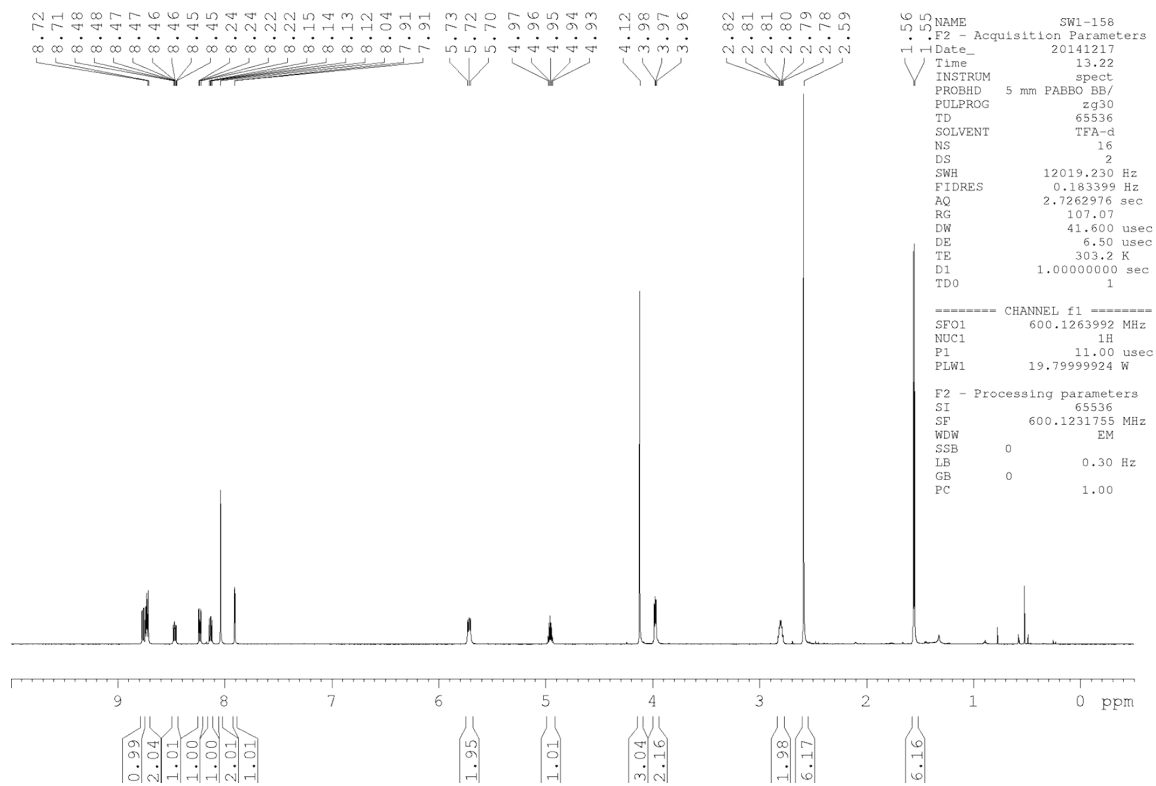

Figure S1b. <sup>1</sup>H-NMR of compound 8 in trifluoroacetic acid-d.

## Compound 8

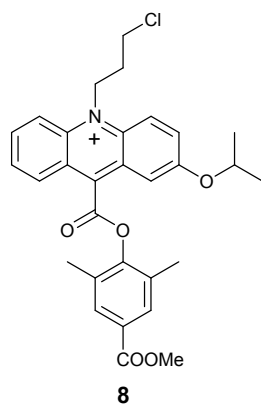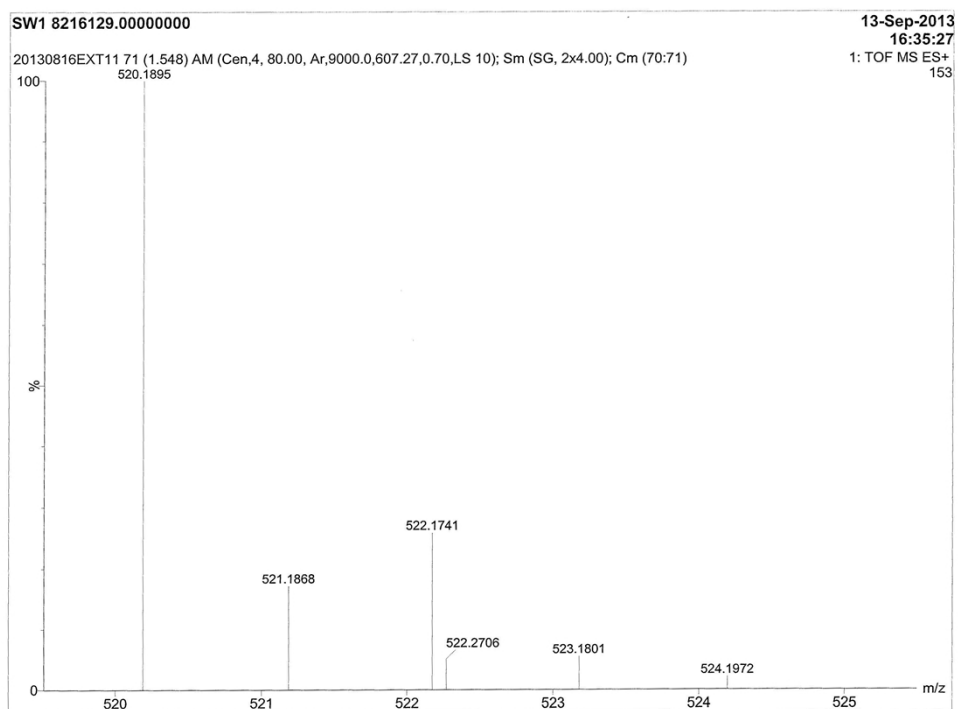

**Figure S1c.** HRMS of compound **8**.

## Compound 9

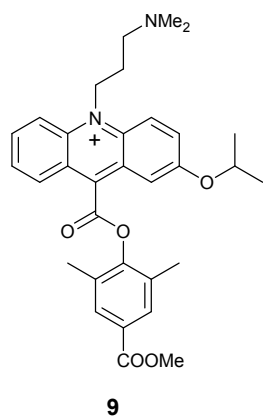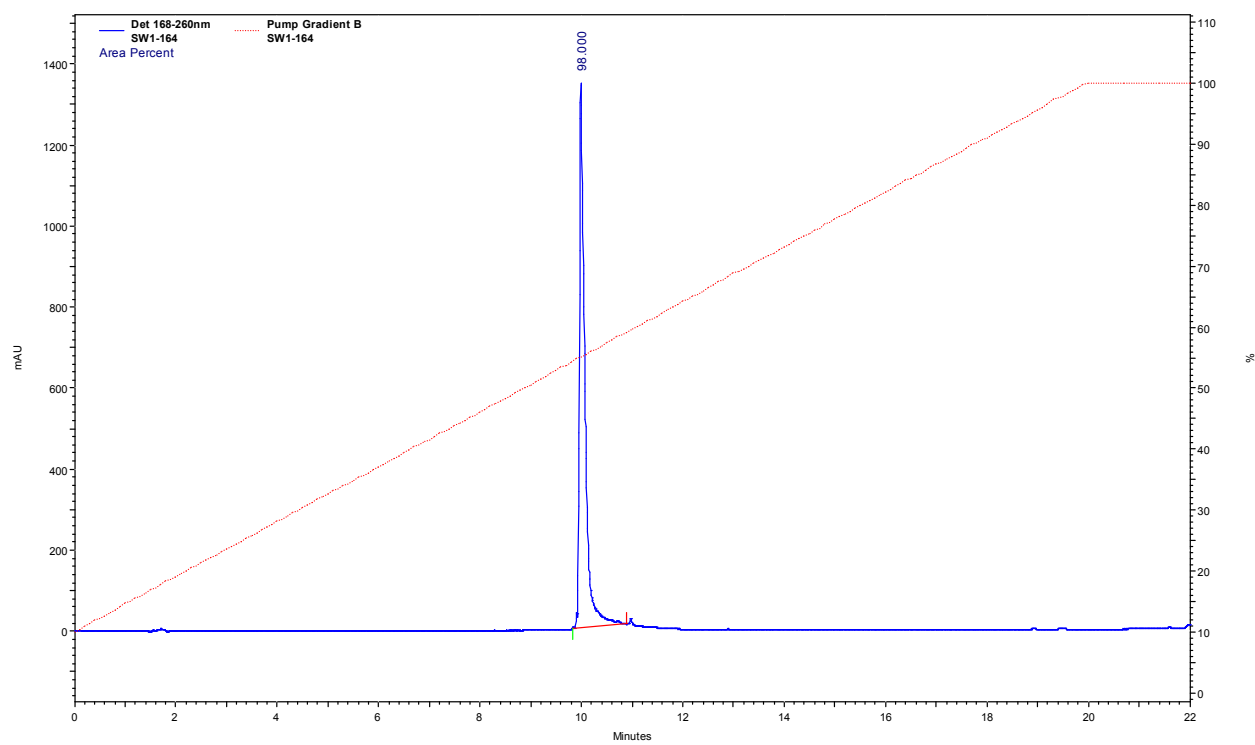

**Figure S2a.** HPLC trace of compound **9**.

# Compound 9

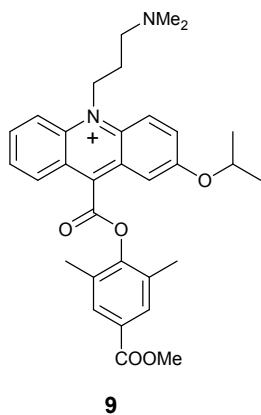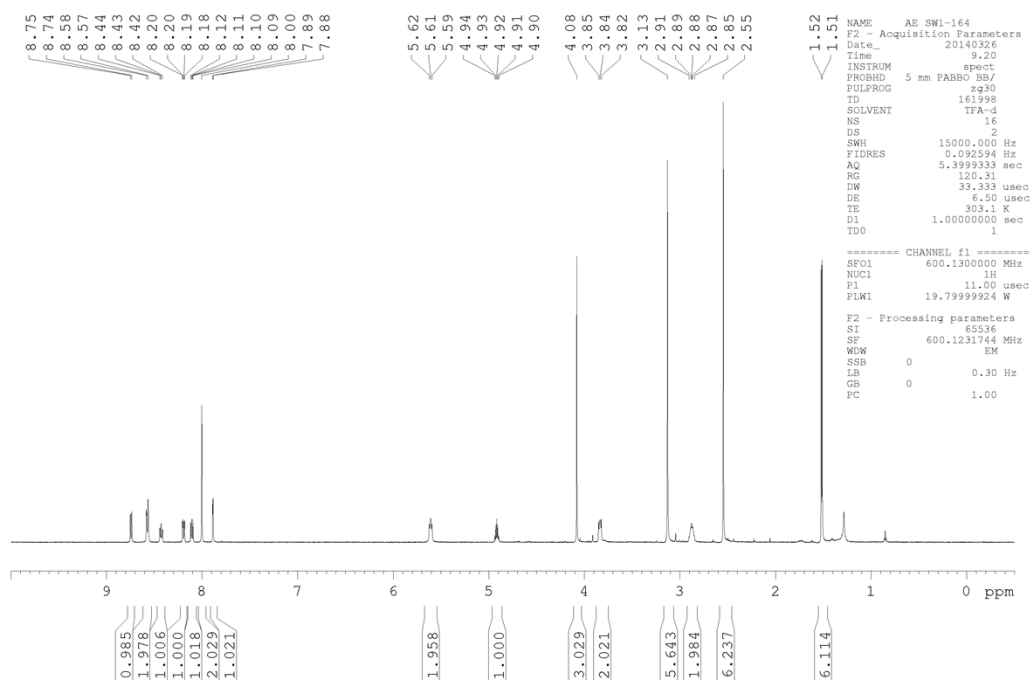

Figure S2b. <sup>1</sup>H-NMR of compound 9 in trifluoroacetic acid-d<sub>4</sub>.

## Compound 9

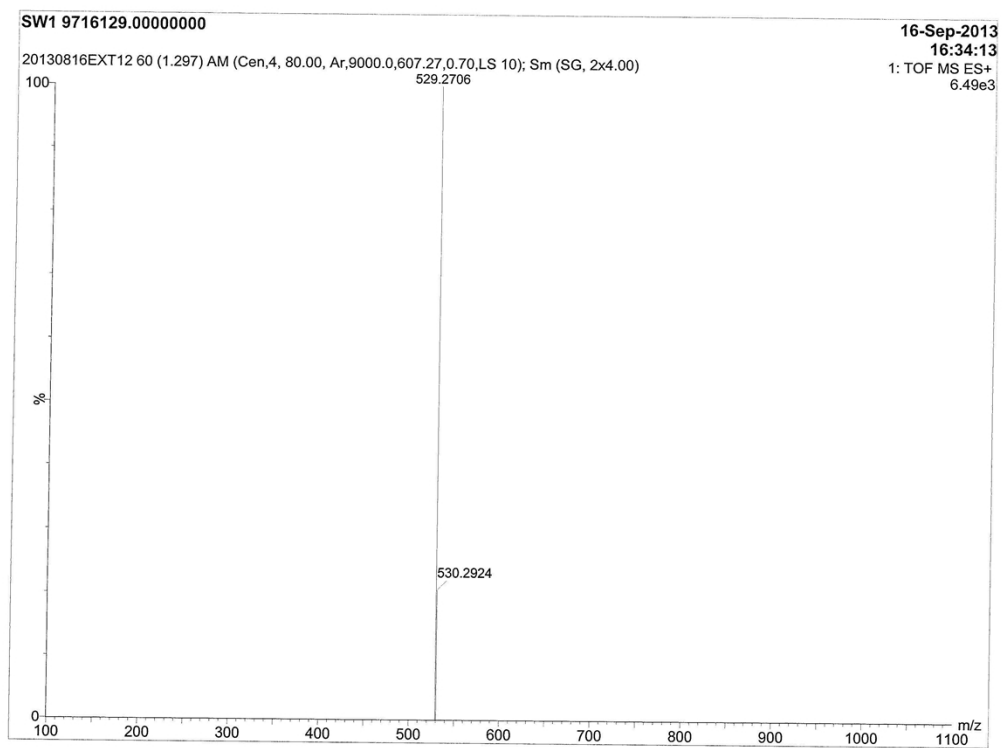

Figure S2c. HRMS of compound 9.



## Compound 2a

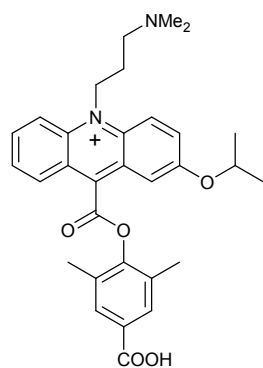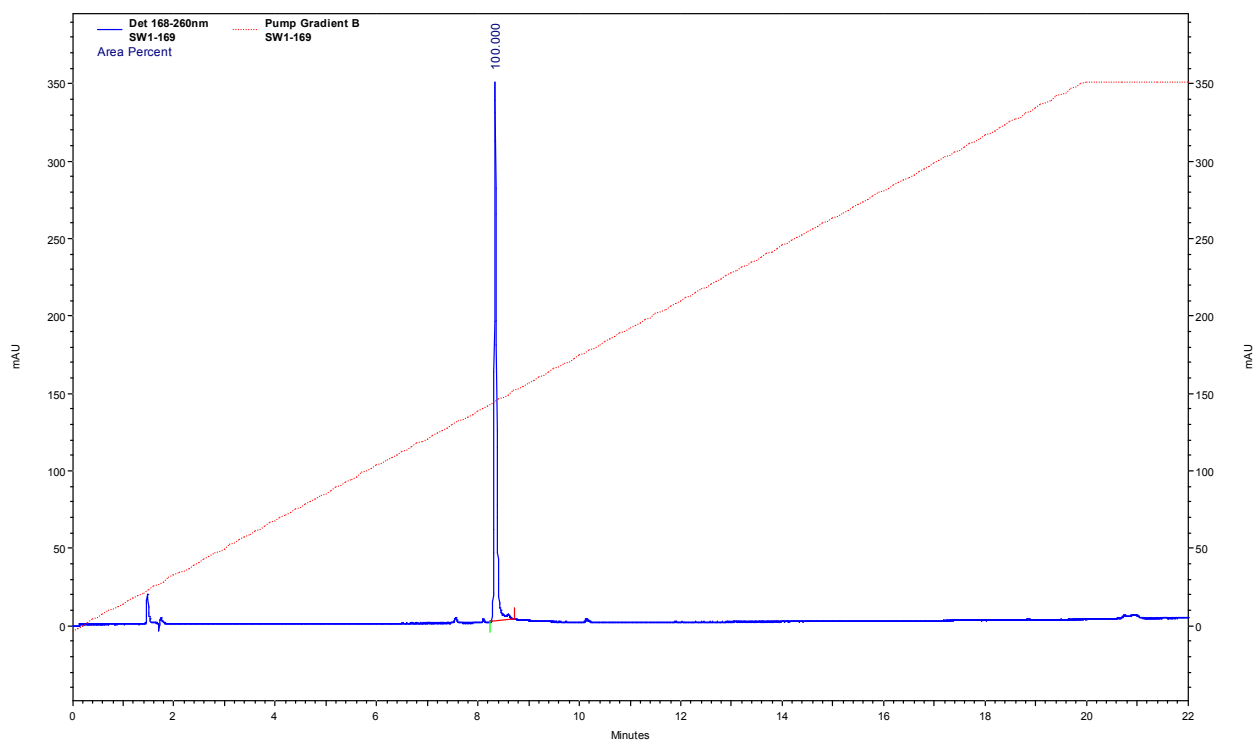

Figure S3a. HPLC trace of compound 2a.

# Compound 2a

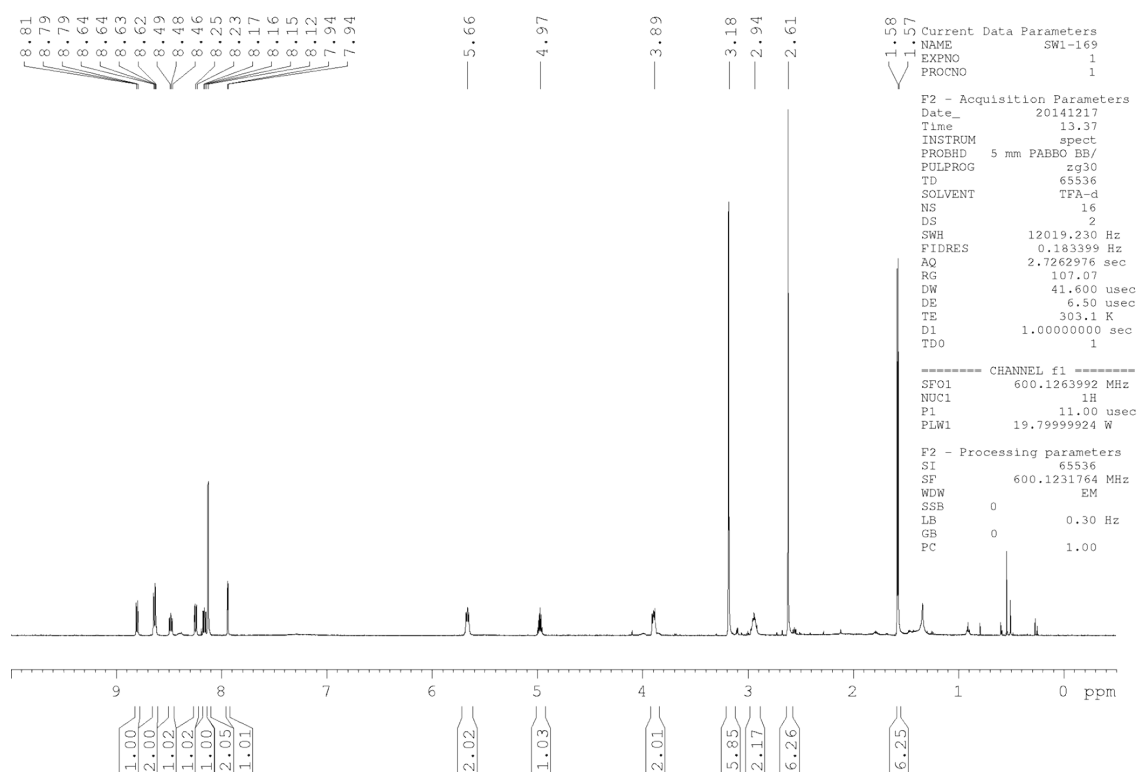

**Figure S3b.** <sup>1</sup>H-NMR of compound **2a** in trifluoroacetic acid-d.

## Compound 2a

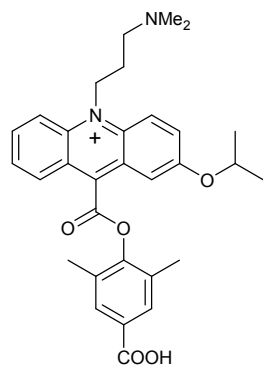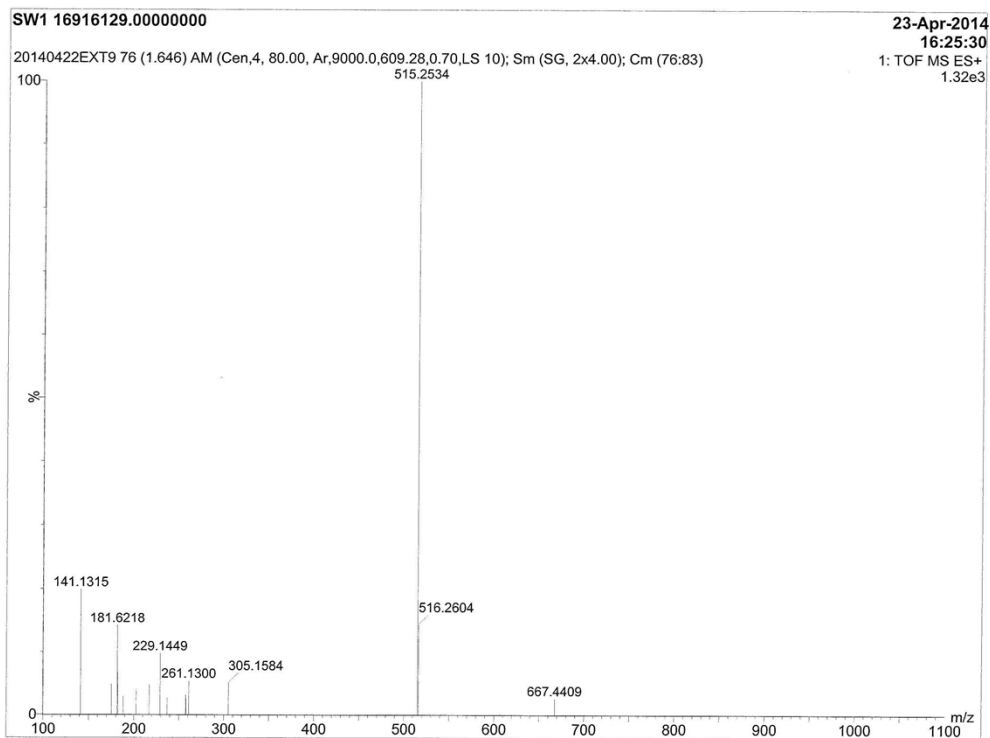

Figure S3c. HRMS of compound 2a.

## Compound 2b

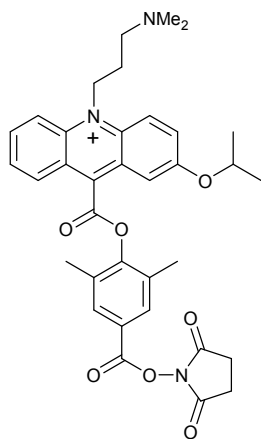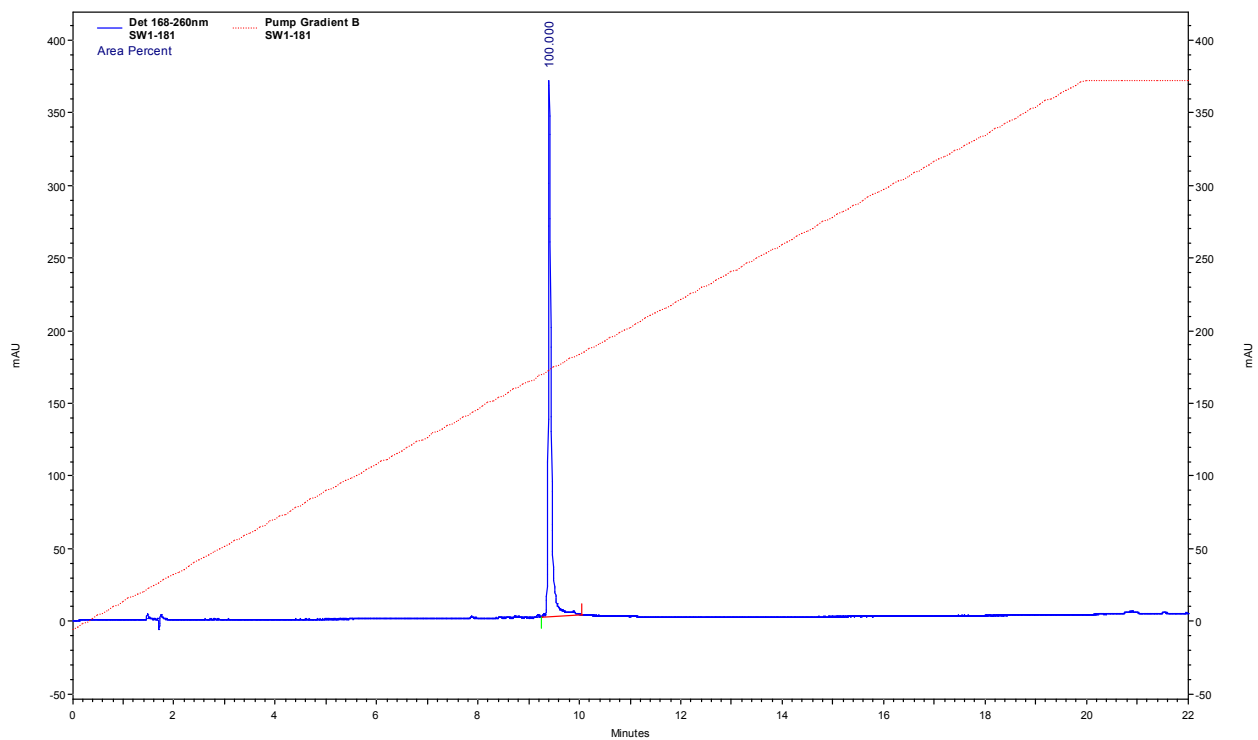

Figure S4a. HPLC trace of compound 2b.

# Compound 2b

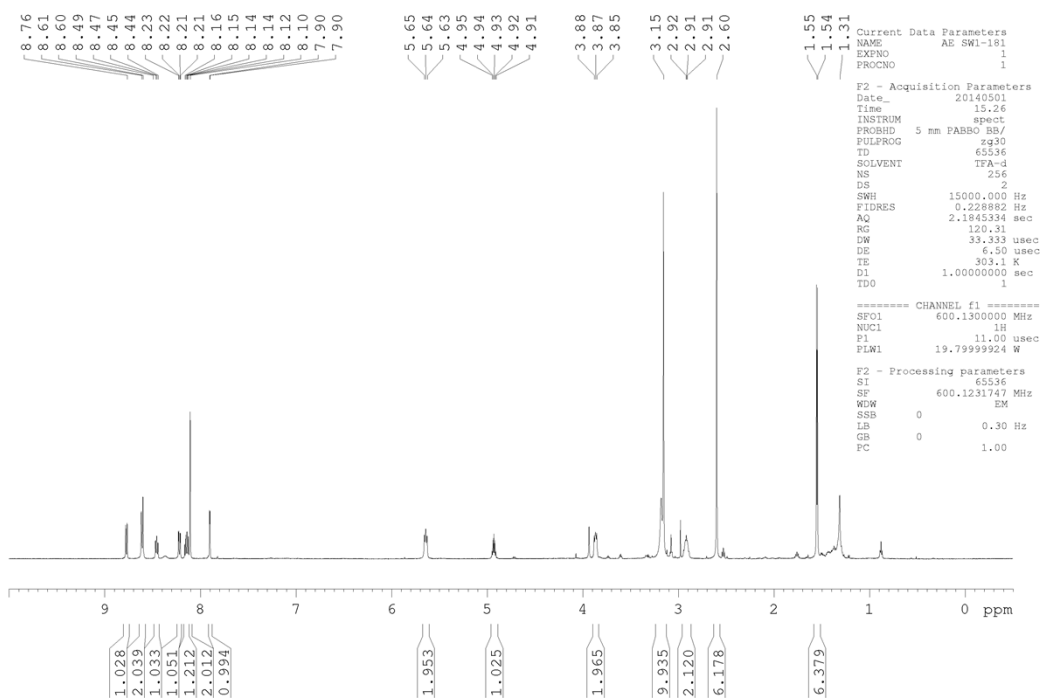

Figure S4b. <sup>1</sup>H-NMR of compound 2b in trifluoroacetic acid-d.

## Compound 2b

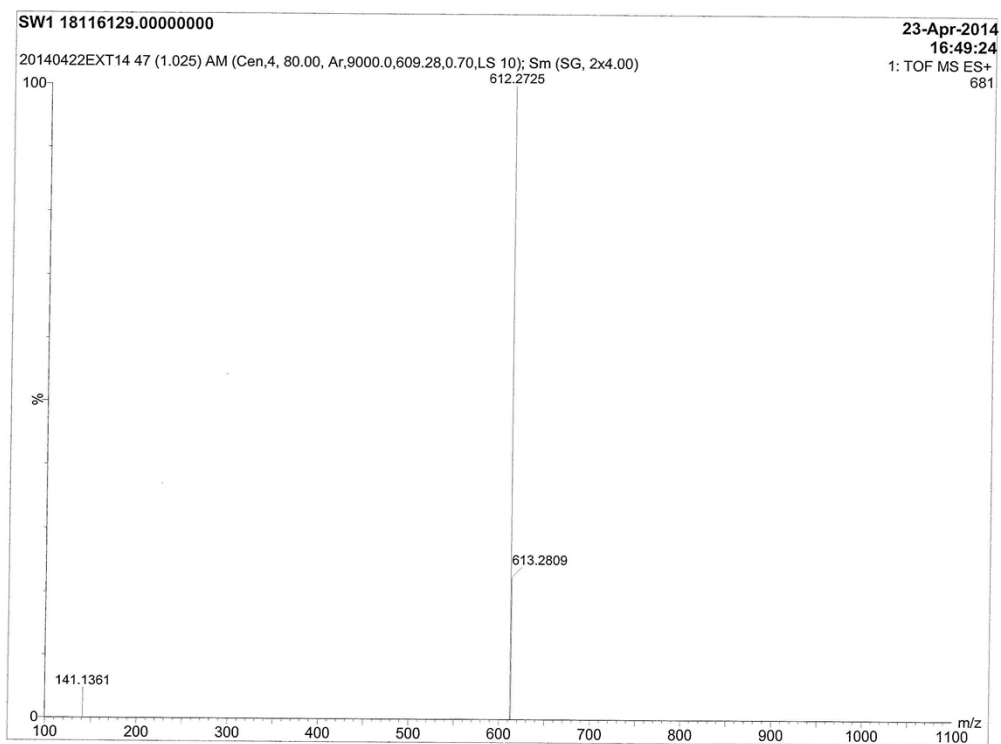

Figure S4c. HRMS of compound 2b.

## Compound 10

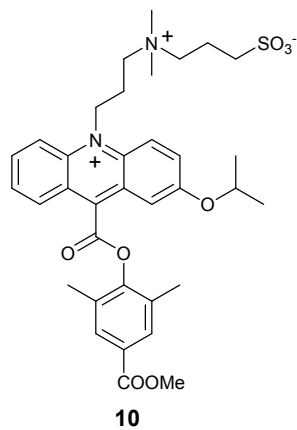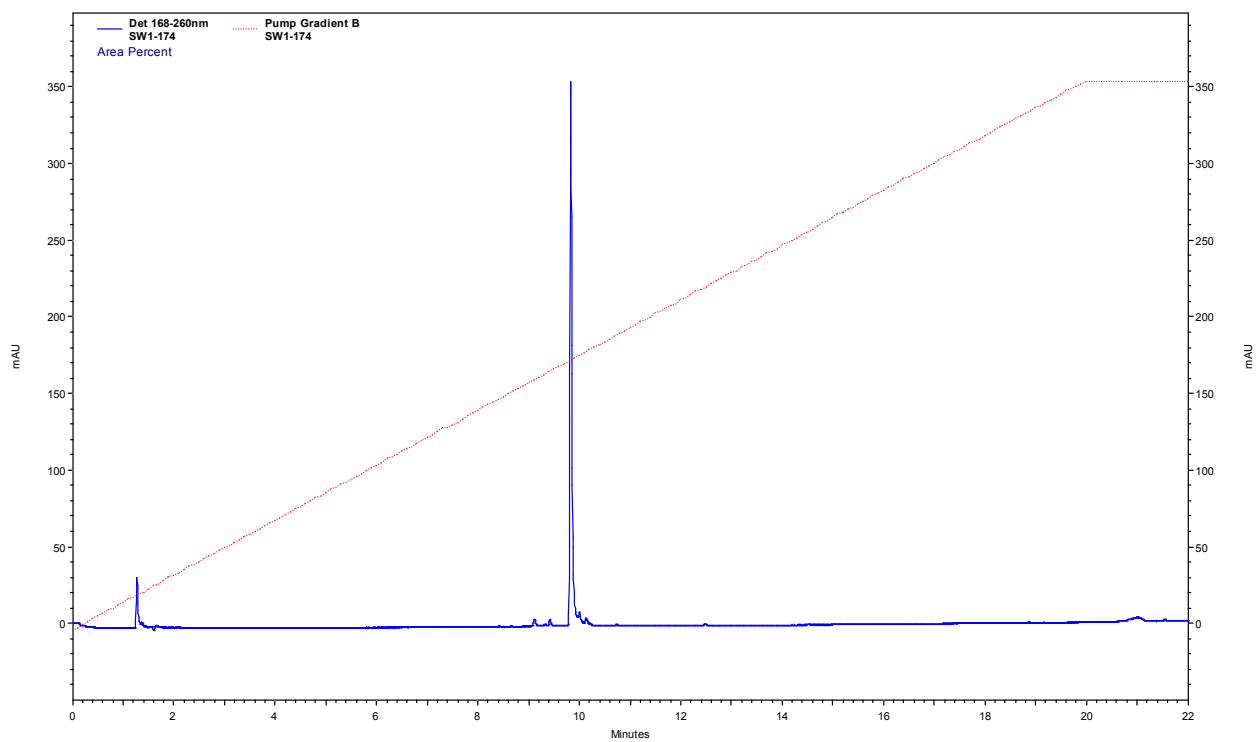

**Figure S5a.** HPLC trace of compound **10**.

# Compound 10

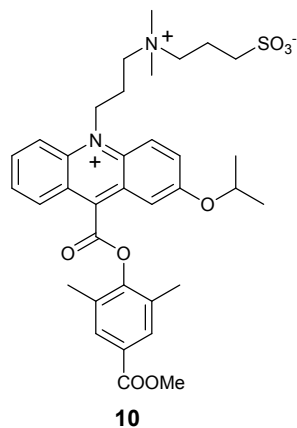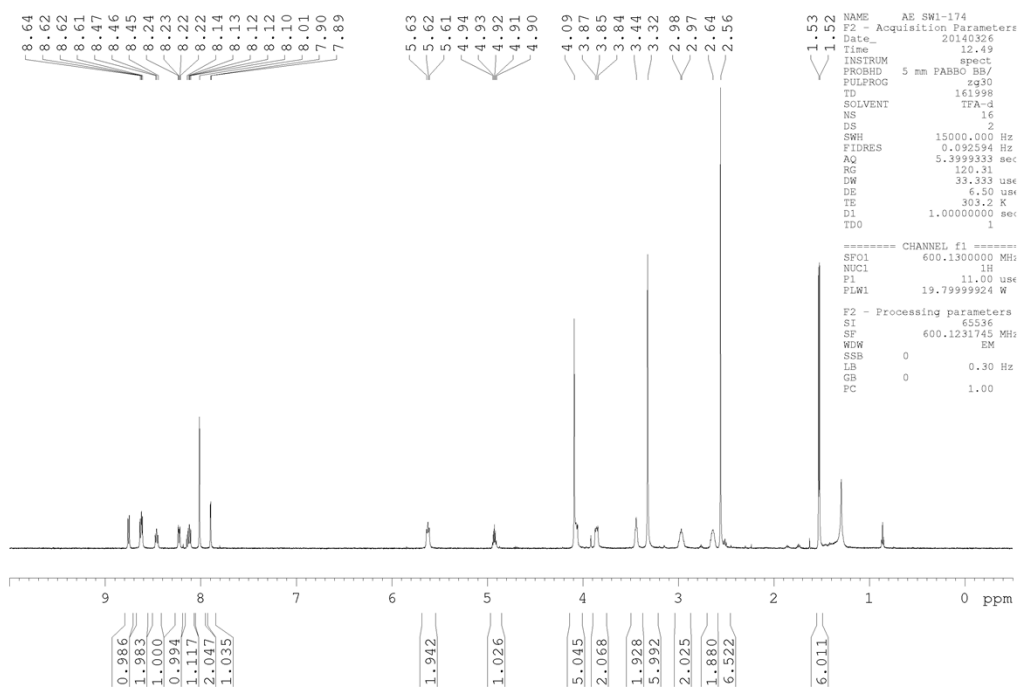

Figure S5b. <sup>1</sup>H-NMR of compound 10 in trifluoroacetic acid-d.



## Compound 10

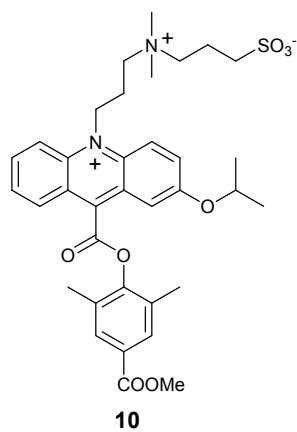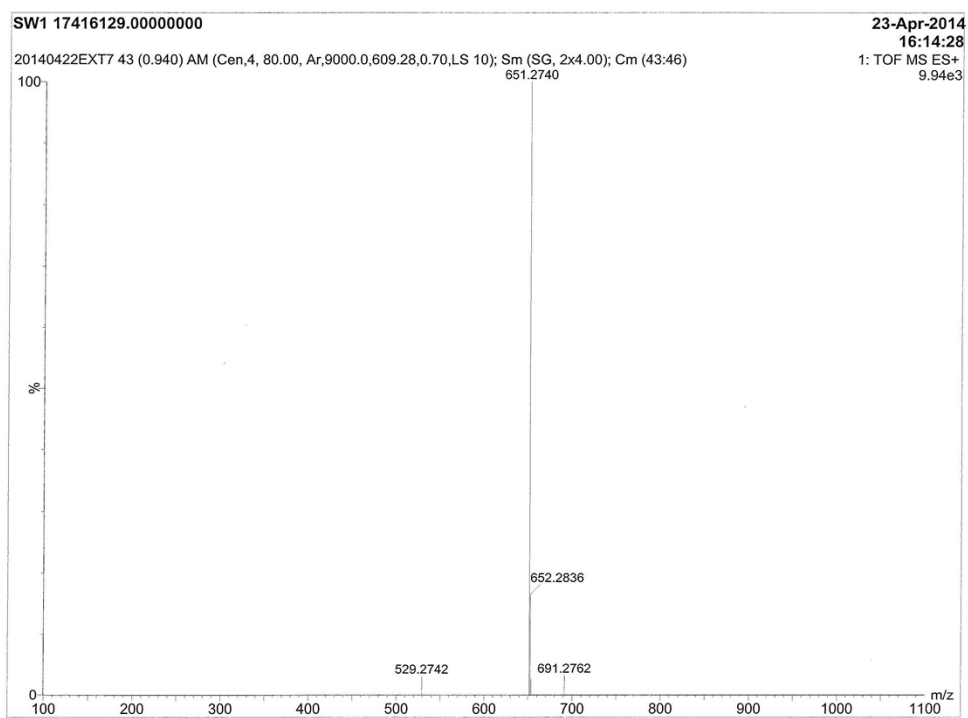

Figure S5c. HRMS of compound 10.

## Compound 3a

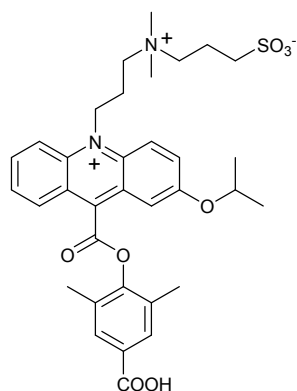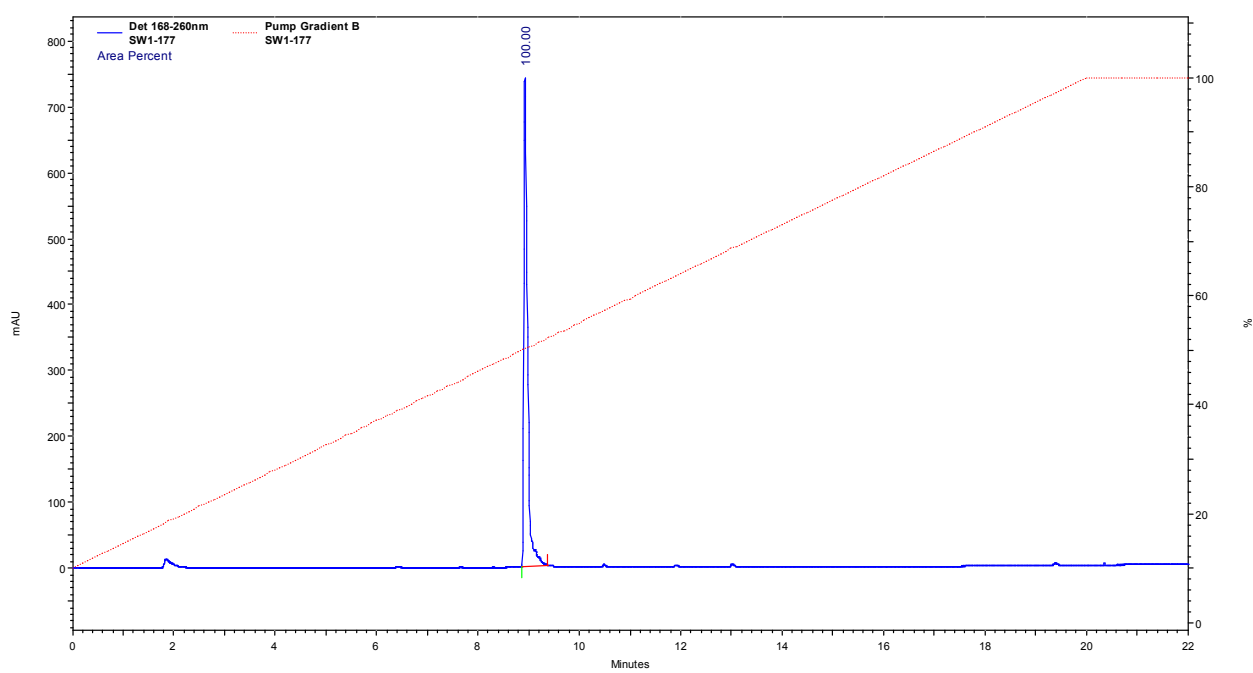

Figure S6a. HPLC trace of compound 3a.

# Compound 3a

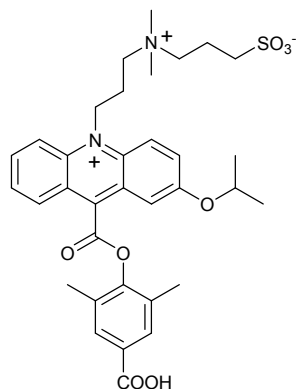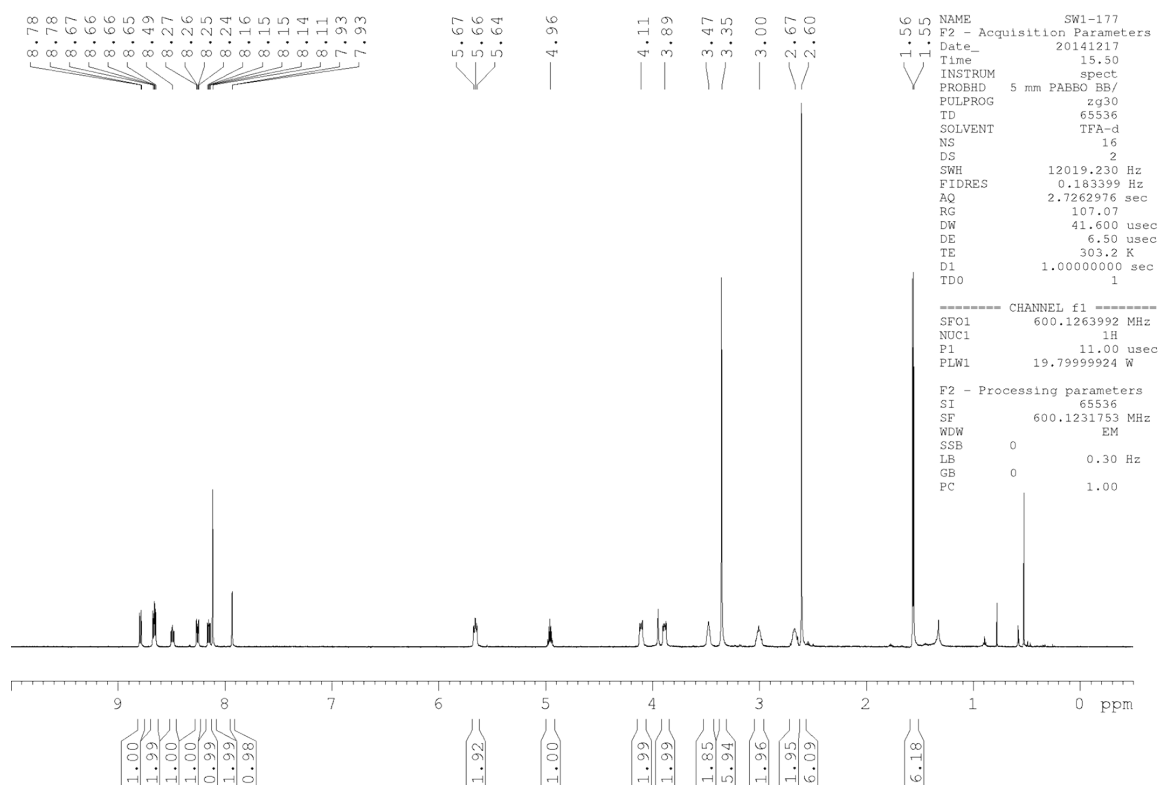

Figure S6b. <sup>1</sup>H-NMR of compound 3a in trifluoroacetic acid-d.

## Compound 3a

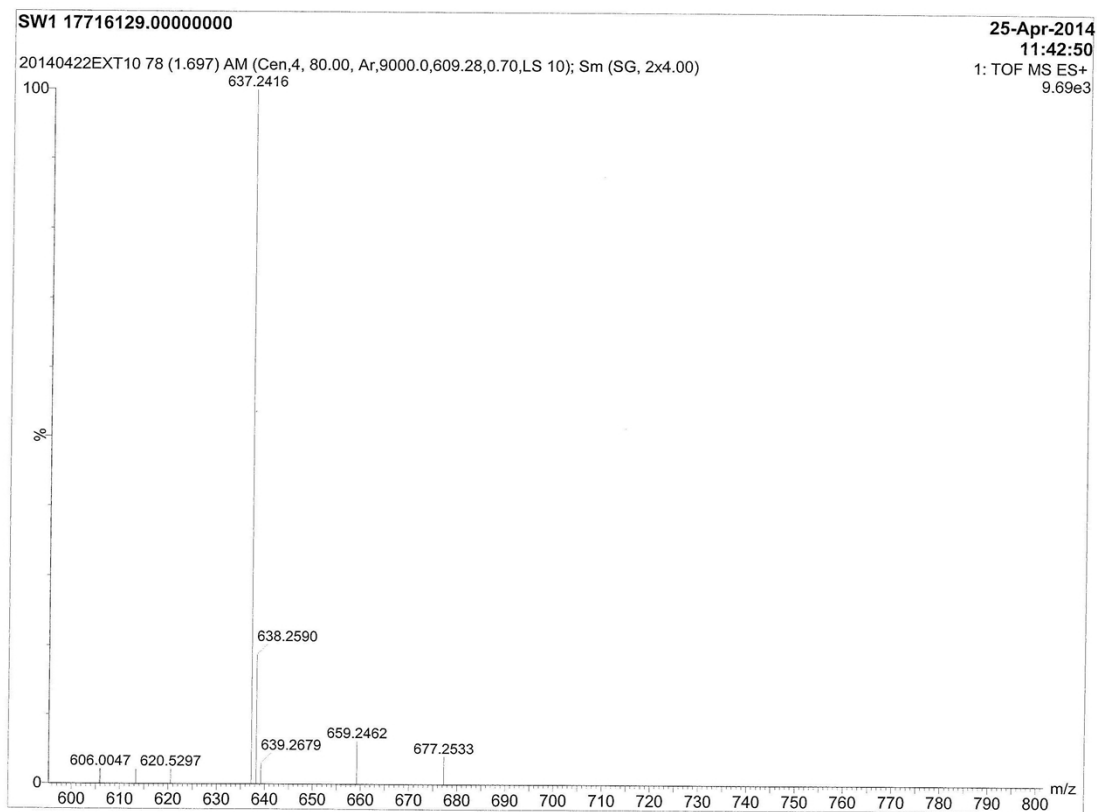

Figure S6c. HRMS of compound 3a.

## Compound 3b

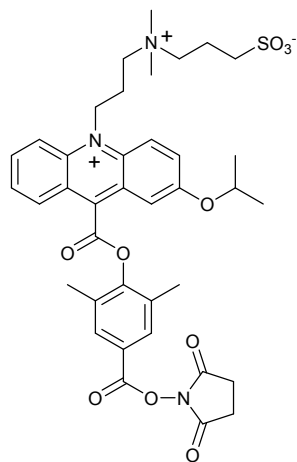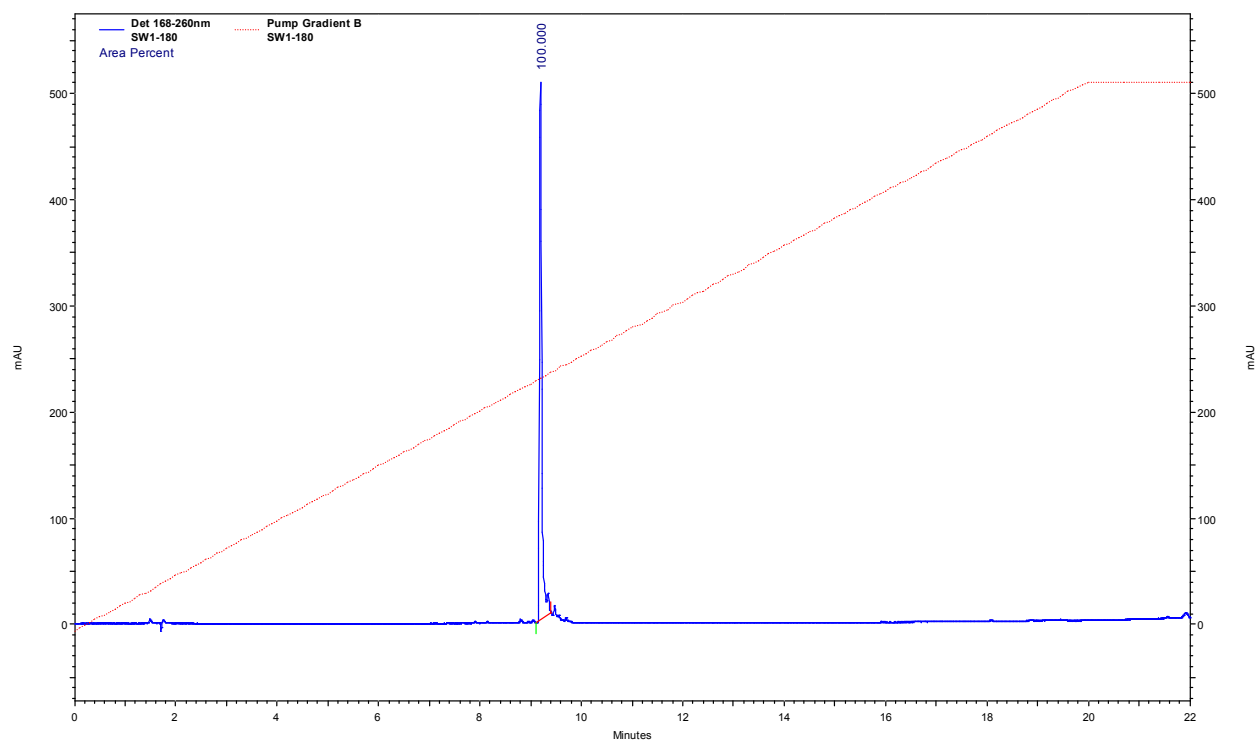

Figure S7a. HPLC trace of compound 3b.

**Compound 3b**

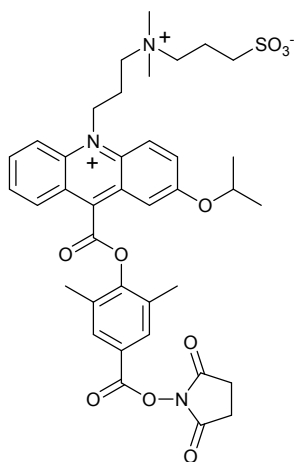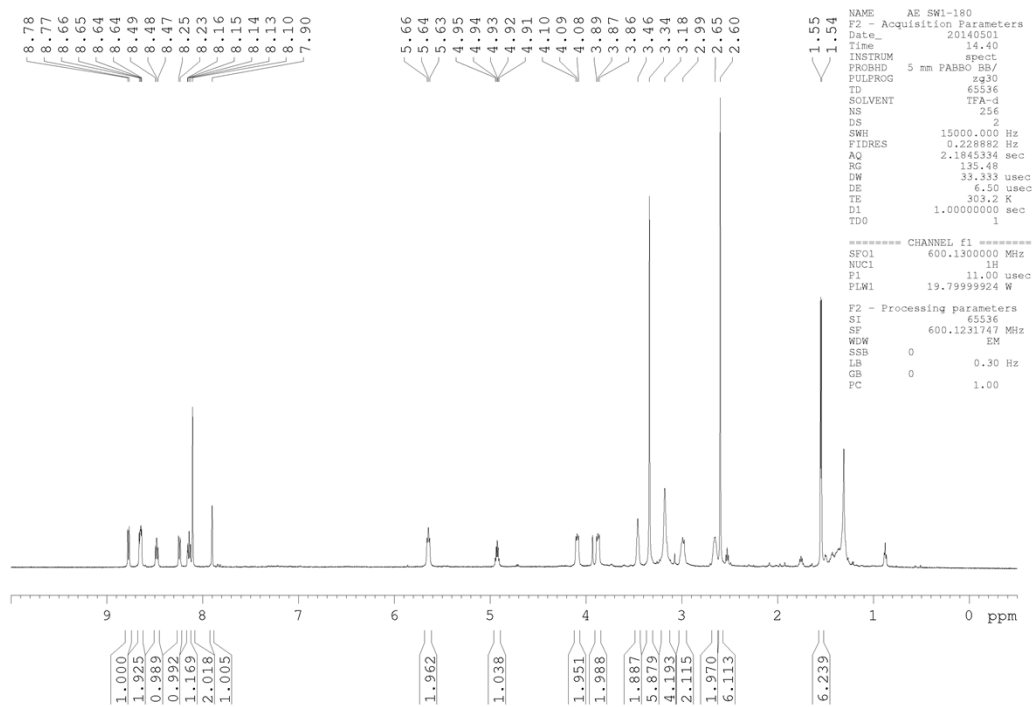

**Figure S7b.** <sup>1</sup>H-NMR of compound **3b** in trifluoroacetic acid-d.

## Compound 3b

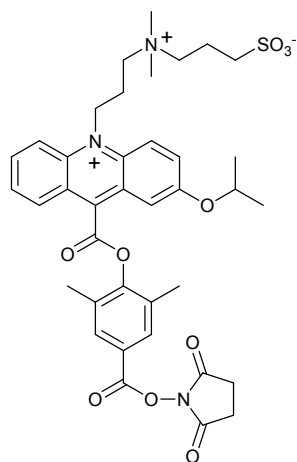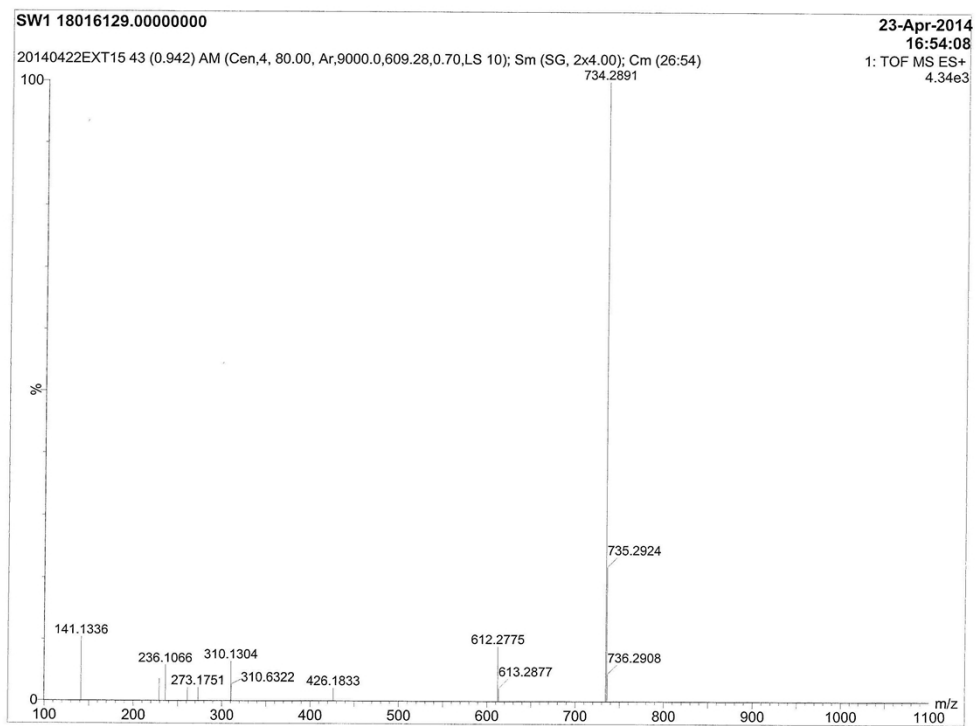

Figure S7c. HRMS of compound 3b.

## Compound 11

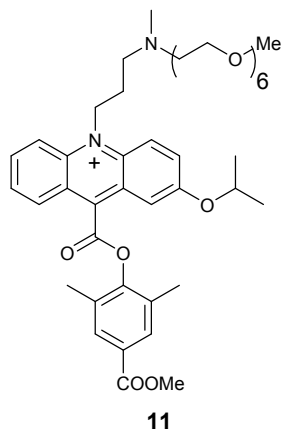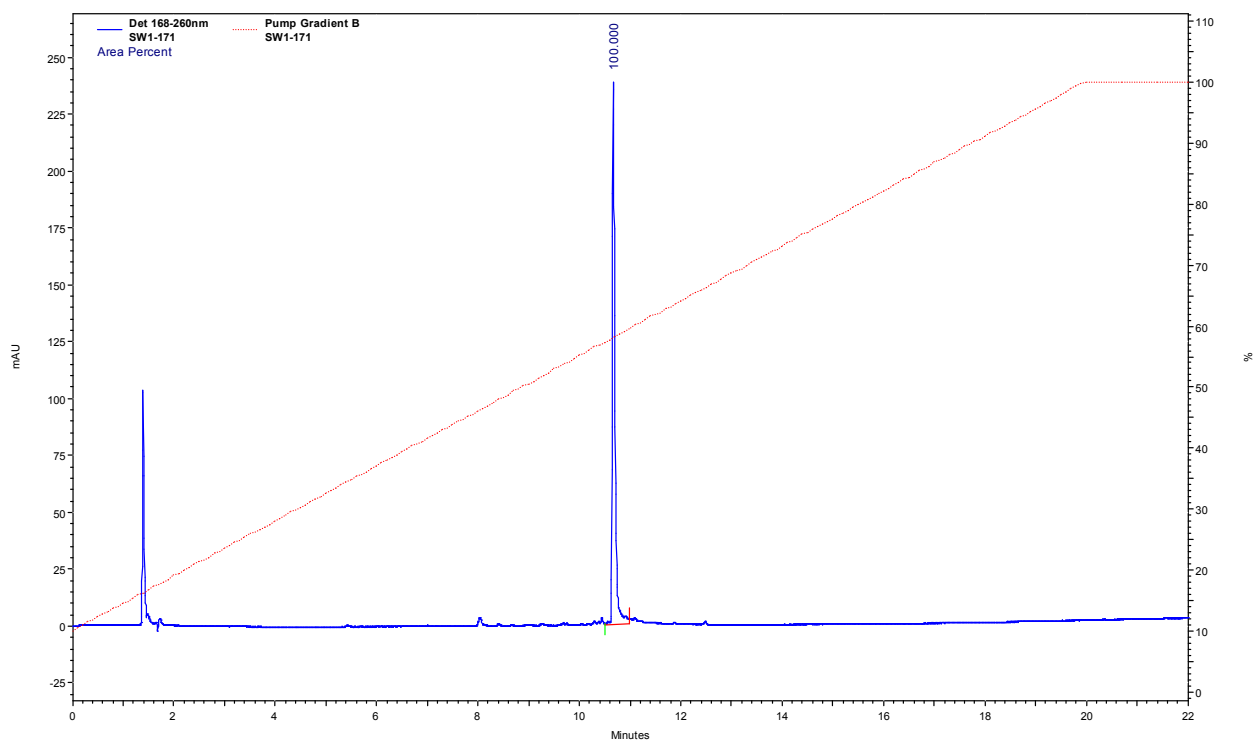

**Figure S8a.** HPLC trace of compound **11**.



# Compound 11

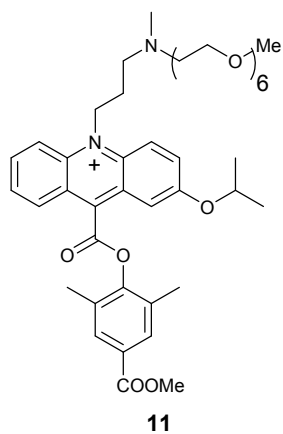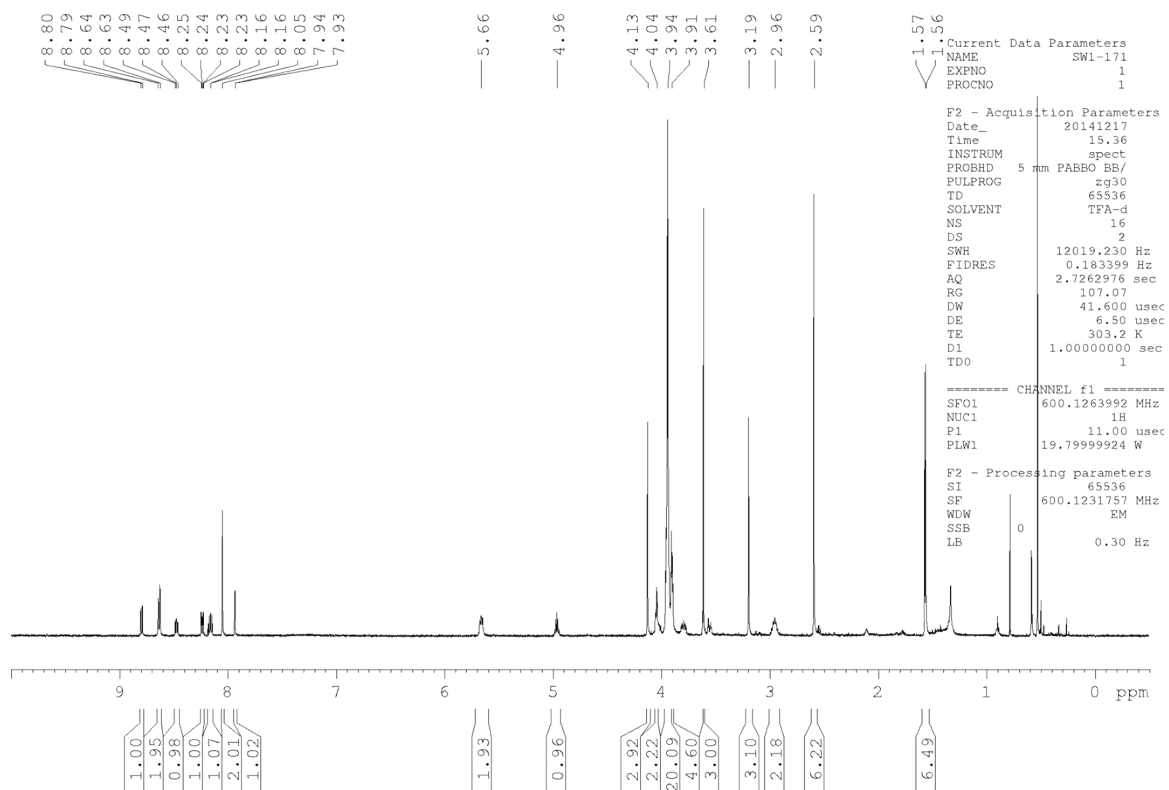

Figure S8b. <sup>1</sup>H-NMR of compound 11 in trifluoroacetic acid-d.

## Compound 11

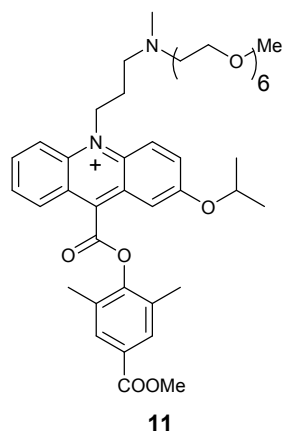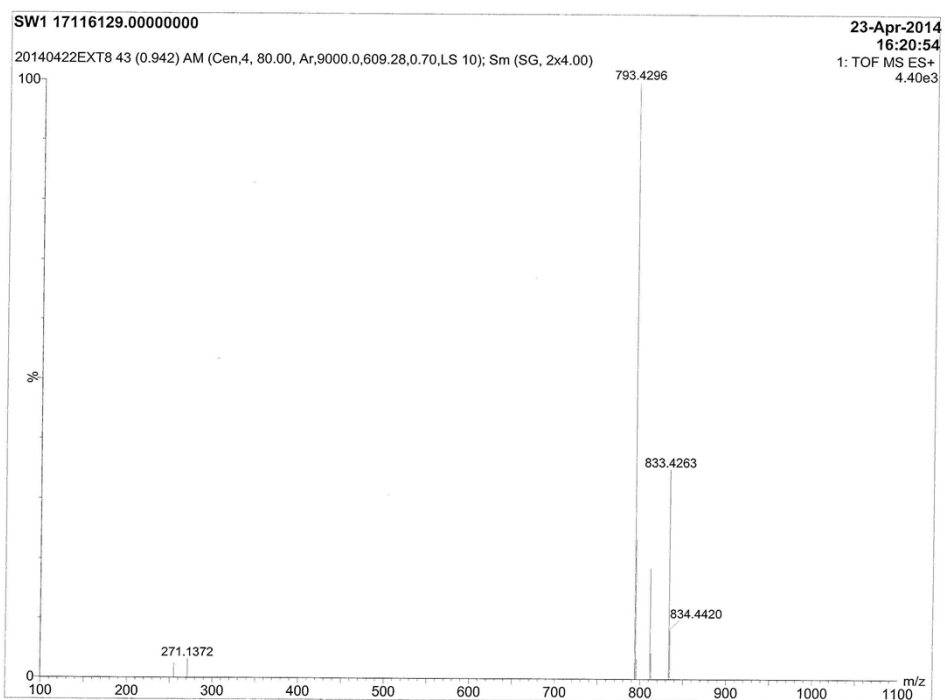

Figure S8c. HRMS of compound 11.

## Compound 4a

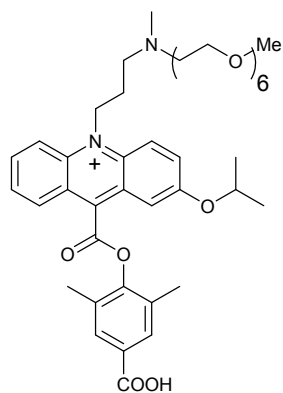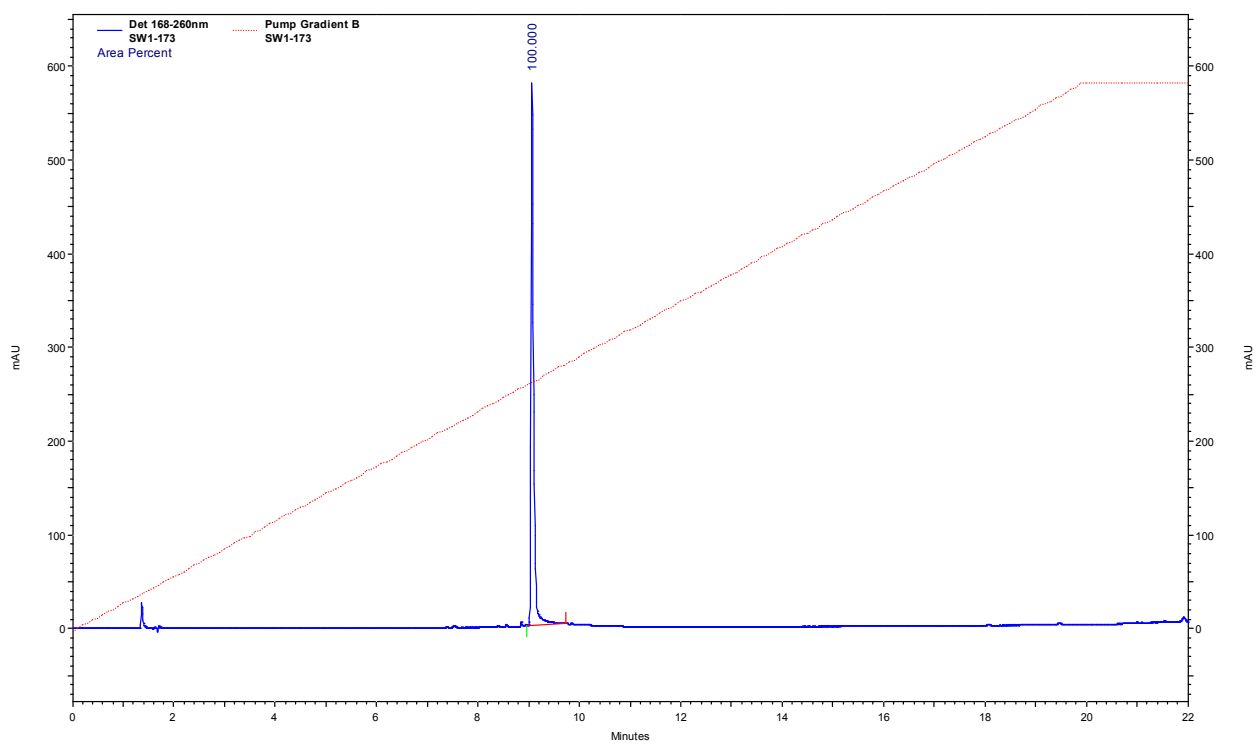

Figure S9a. HPLC trace of compound 4a.

# Compound 4a

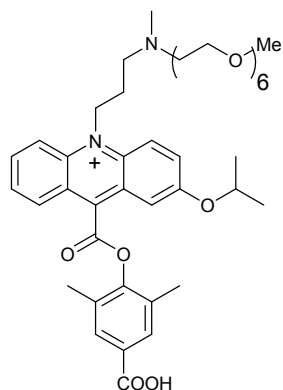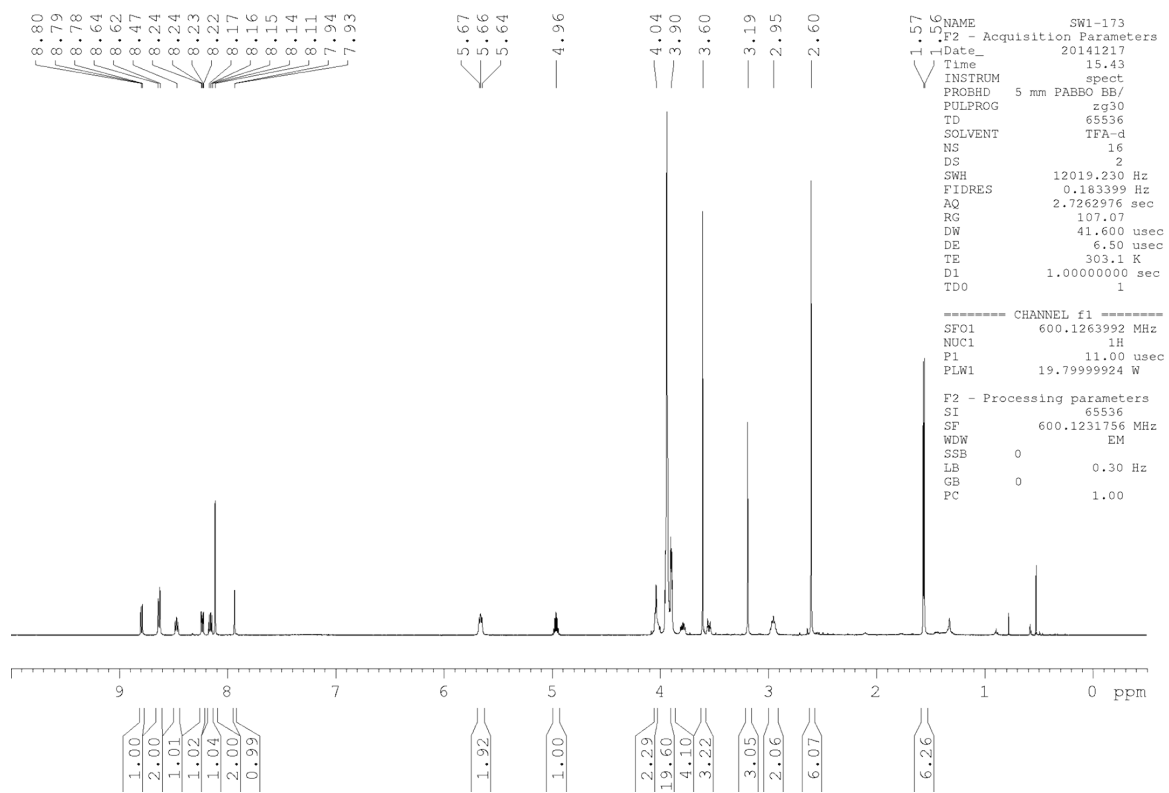

Figure S9b. <sup>1</sup>H-NMR of compound 4a in trifluoroacetic acid-d.

## Compound 4a

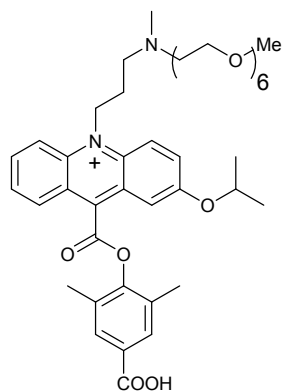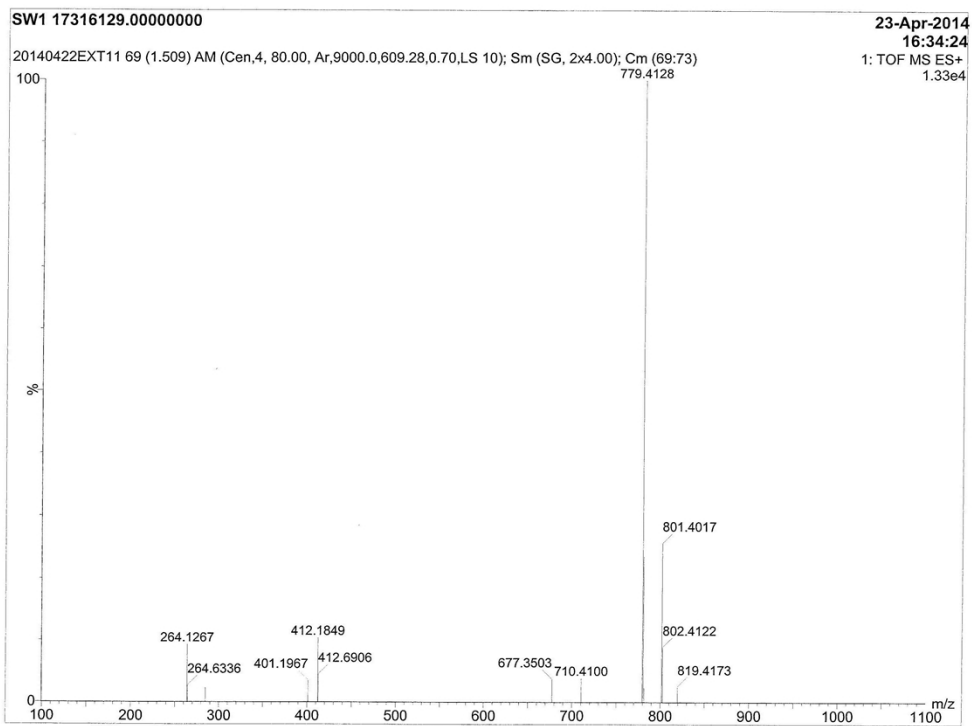

**Figure S9c.** HRMS of compound 4a.

## Compound 4b

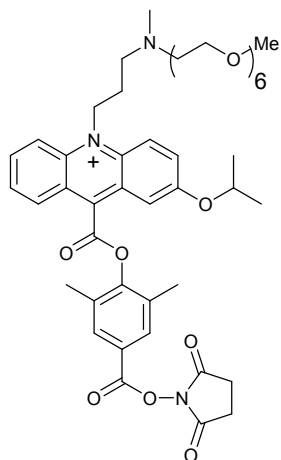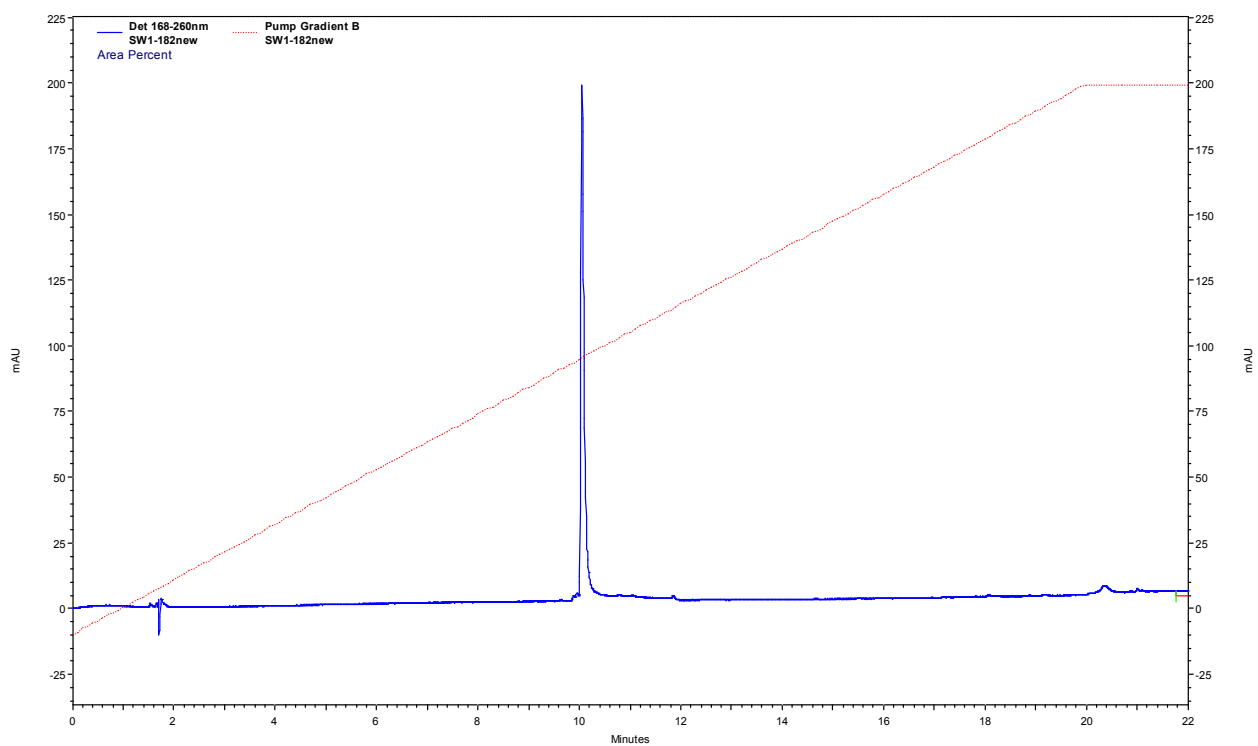

Figure S10a. HPLC trace of compound 4b.

# Compound 4b

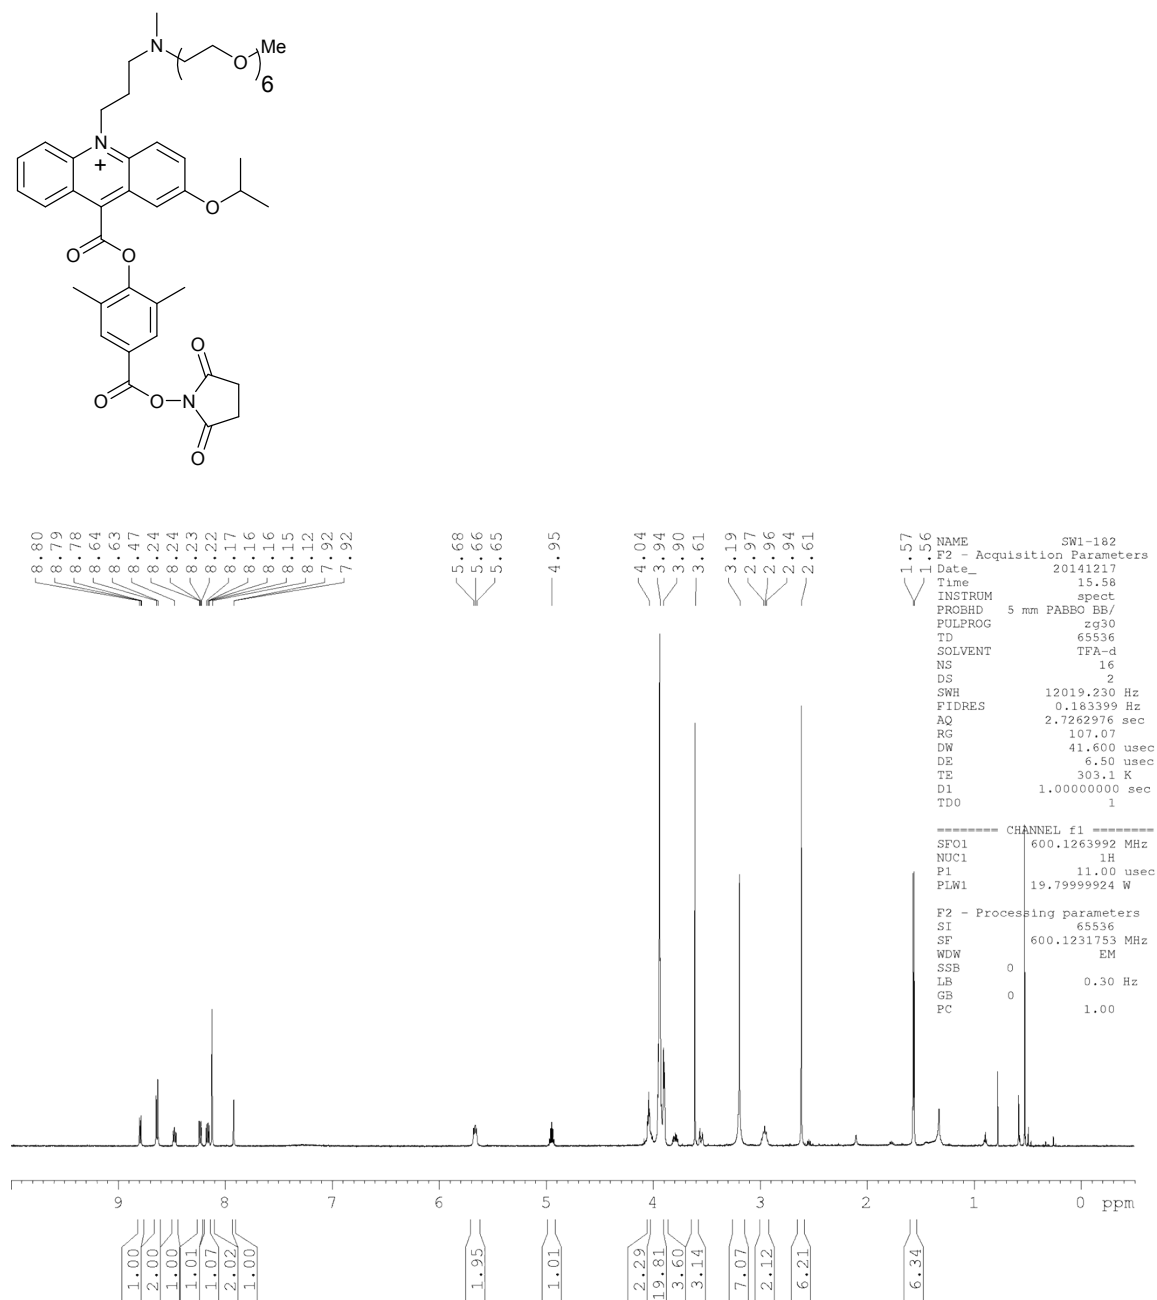

**Figure S10b.** <sup>1</sup>H-NMR of compound **4b** in trifluoroacetic acid-d.

## Compound 4b

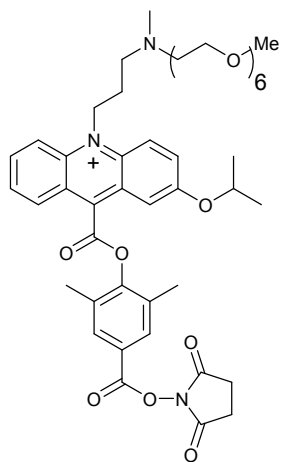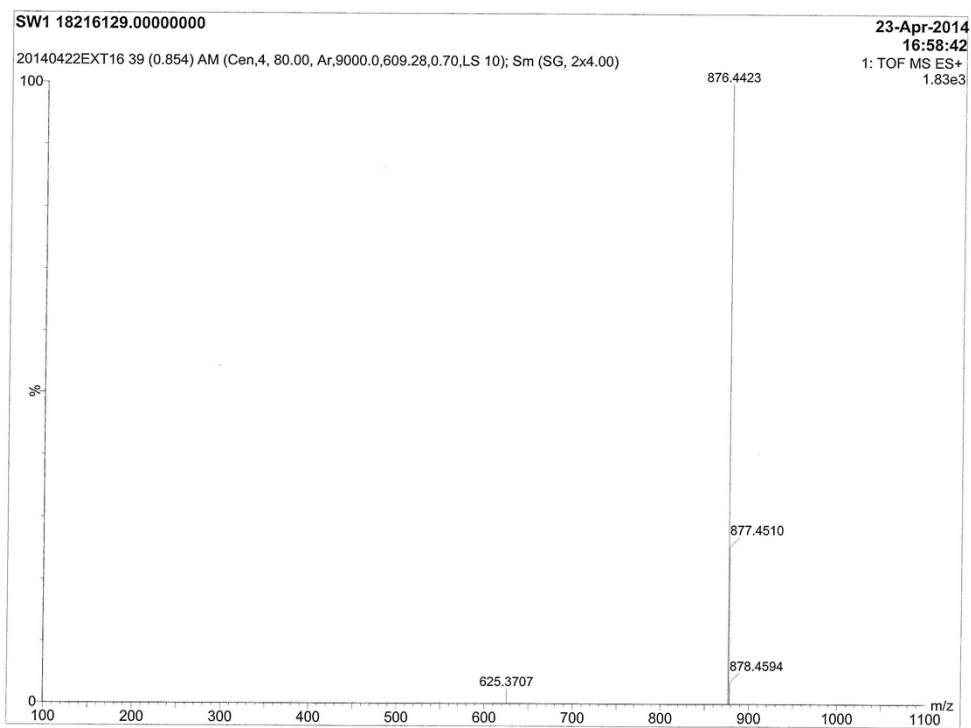

Figure S10c. HRMS of compound 4b.



## Compound 13

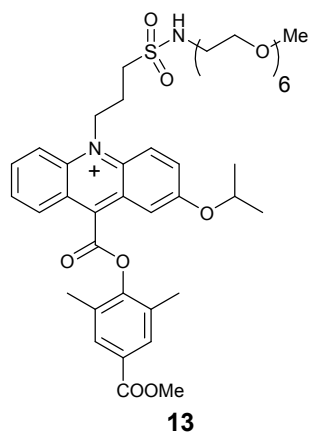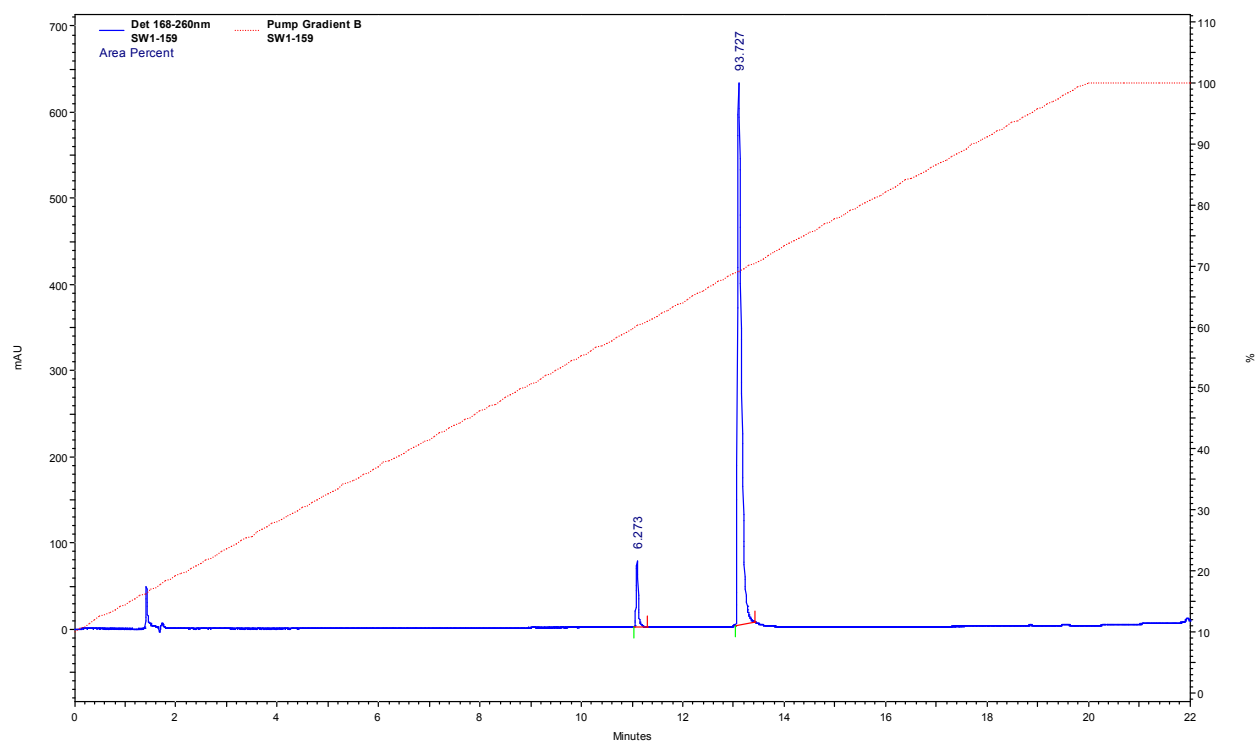

Figure S11a. HPLC trace of compound 13.

# Compound 13

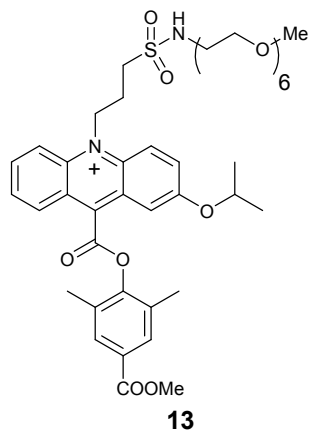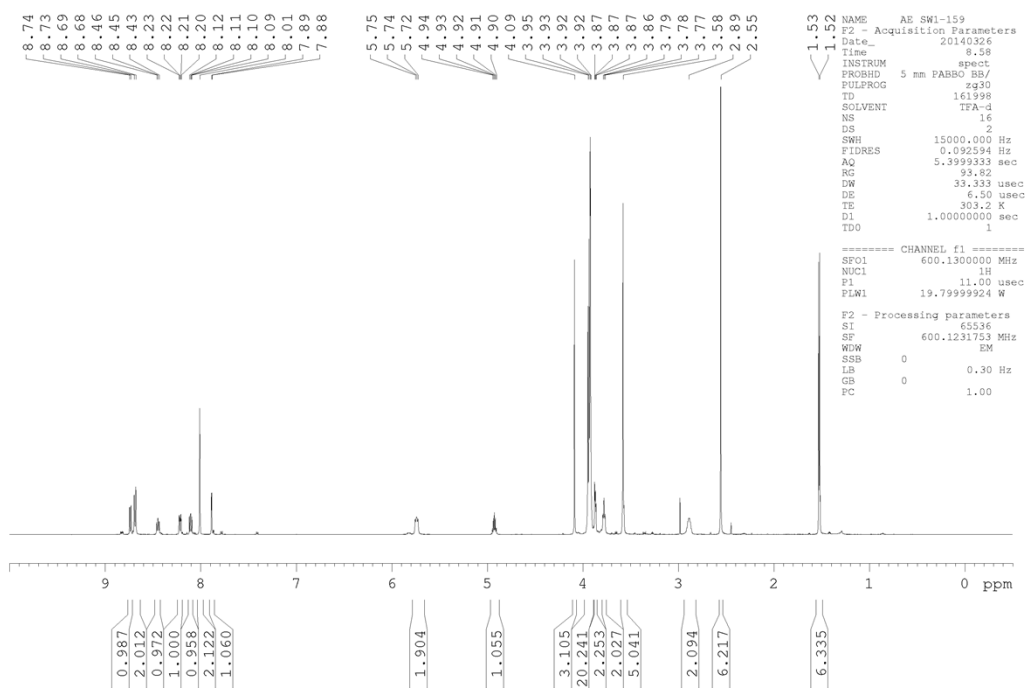

**Figure S11b.** <sup>1</sup>H-NMR of compound **13** in trifluoroacetic acid-d.

### Compound 13

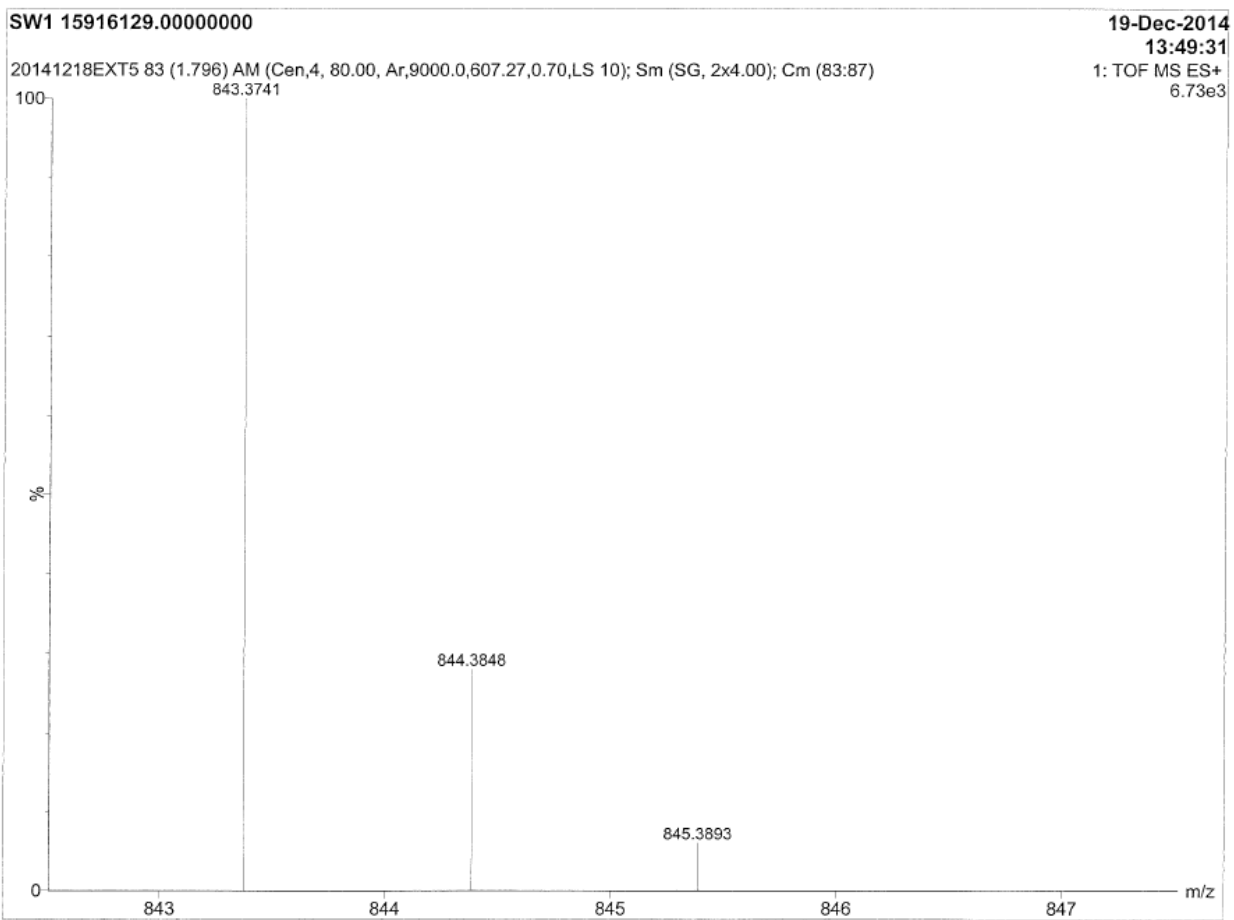

Figure S11c. HRMS of compound 13.

## Compound 5a

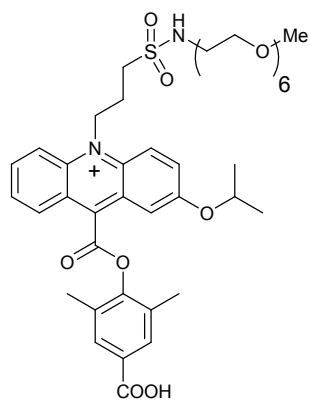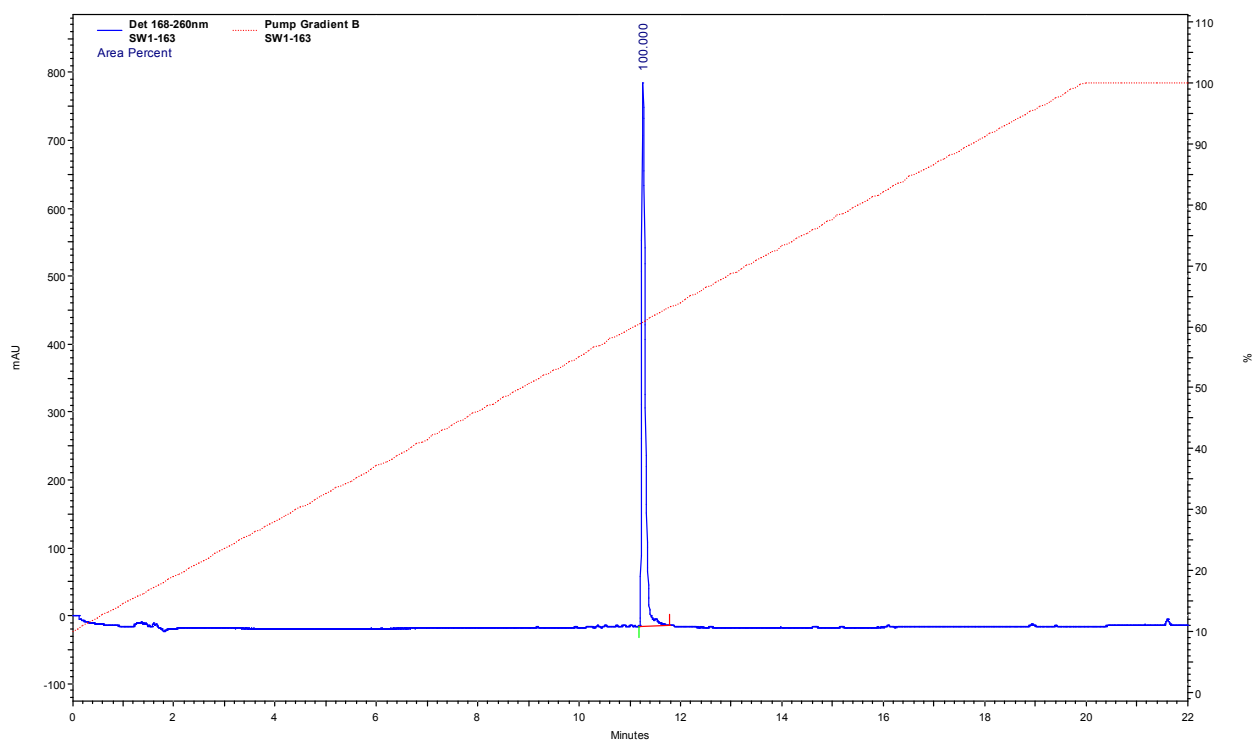

Figure S12a. HPLC trace of compound 5a.

**Compound 5a**

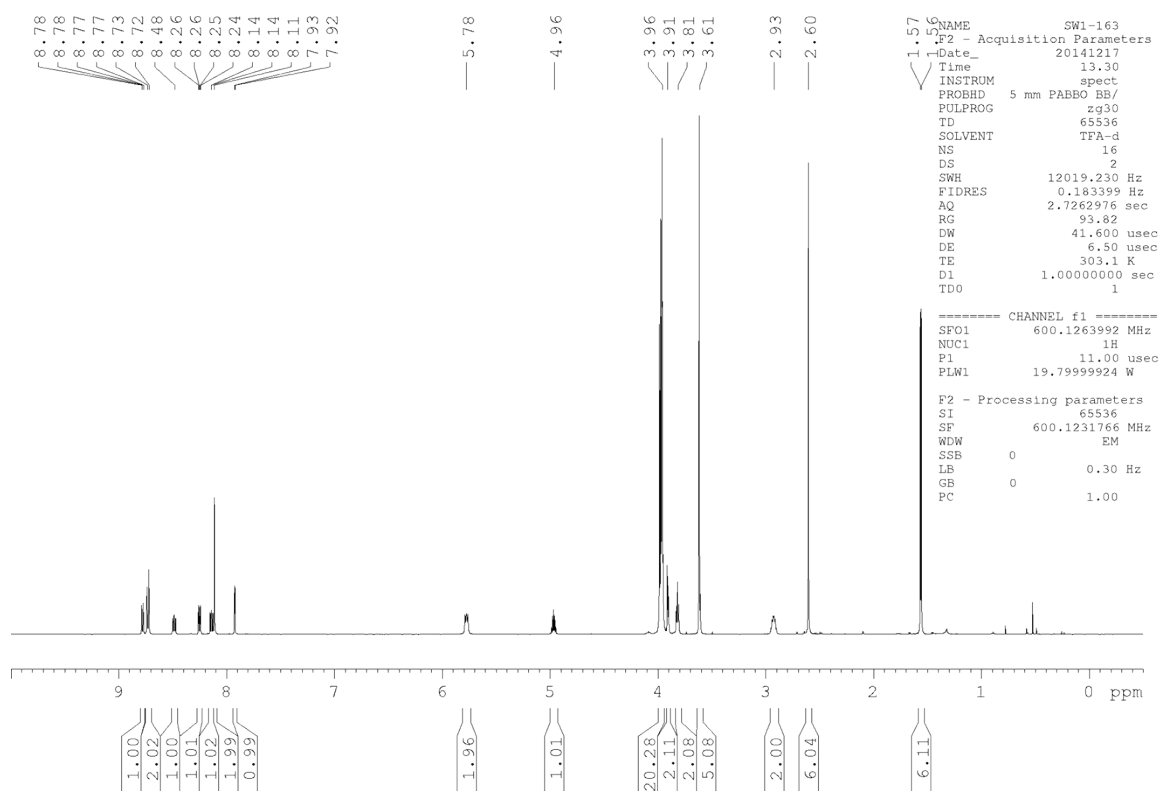

**Figure S12b.** <sup>1</sup>H-NMR of compound **5a** in trifluoroacetic acid-d.

## Compound 5a

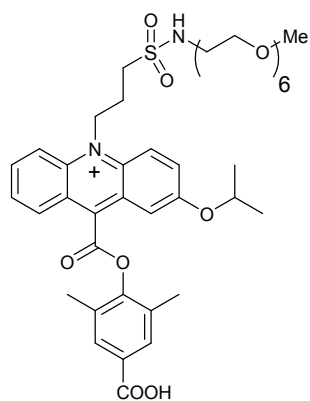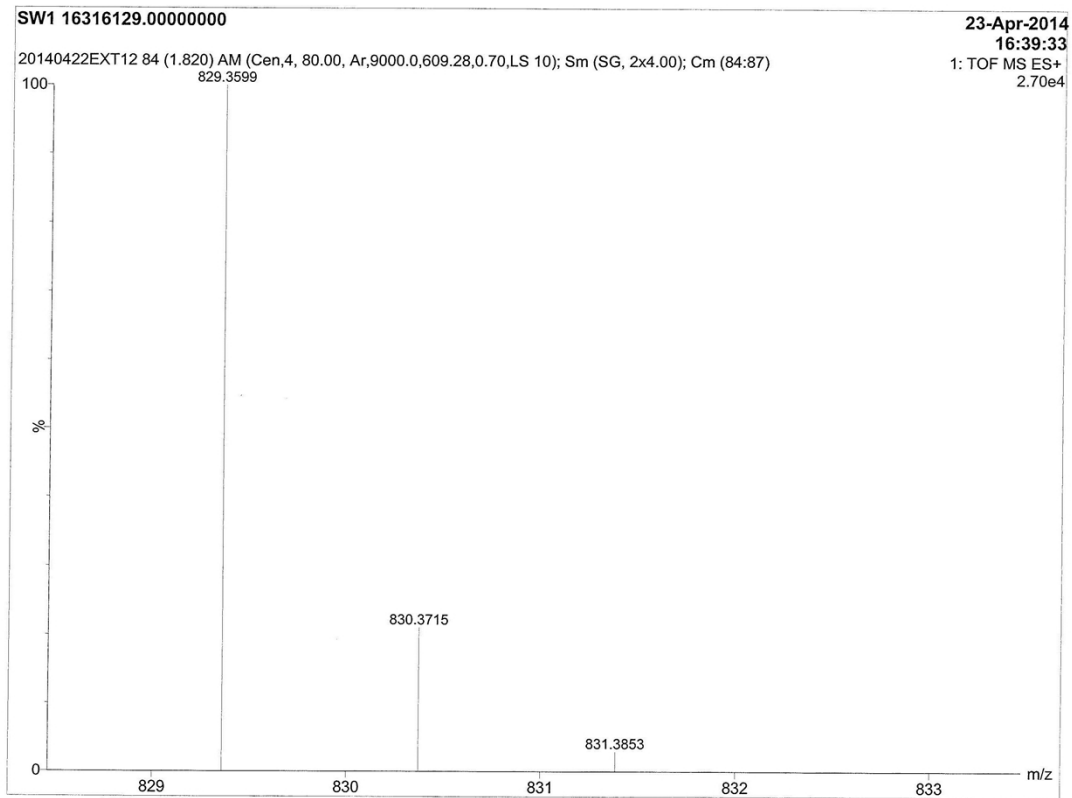

Figure S12c. HRMS of compound 5a.

## Compound 5b

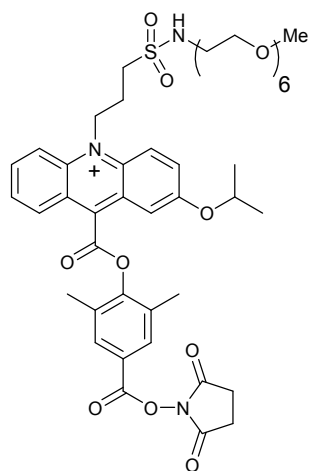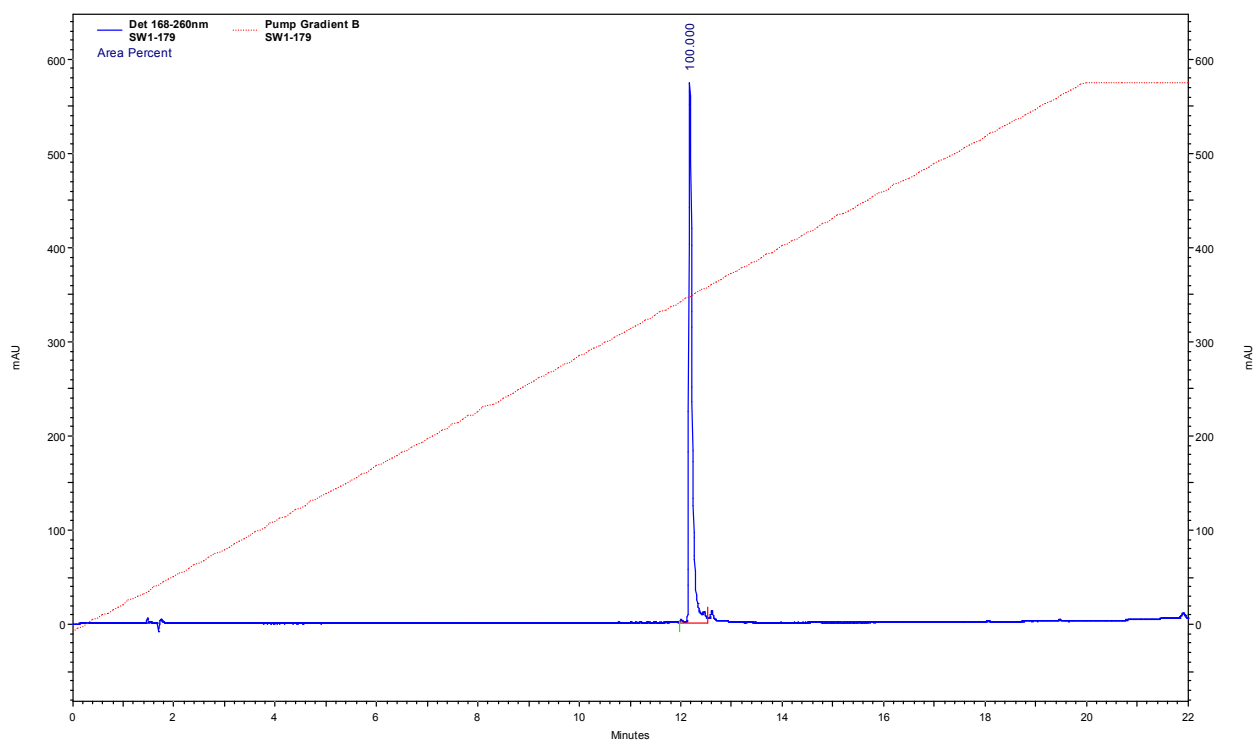

Figure S13a. HPLC trace of compound 5b.

# Compound 5b

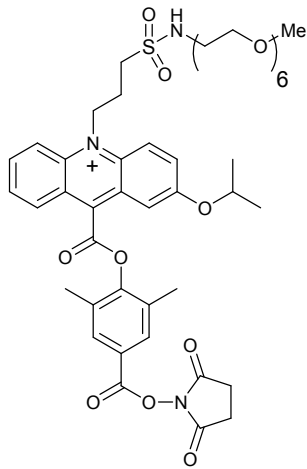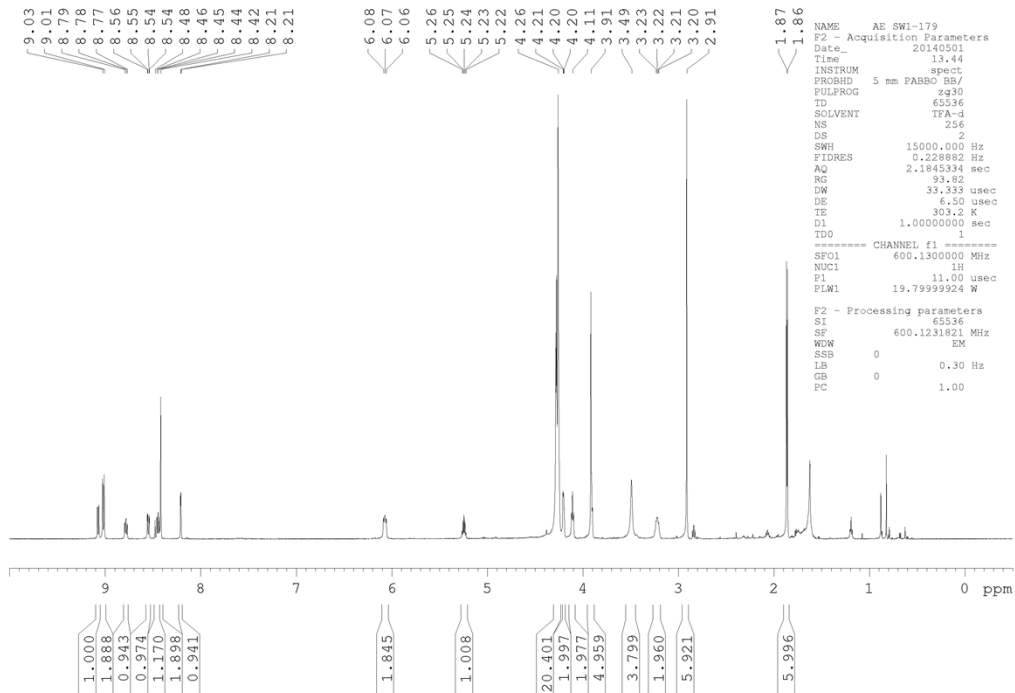

Figure S13b. <sup>1</sup>H-NMR of compound 5b in trifluoroacetic acid-d.



## Compound 5b

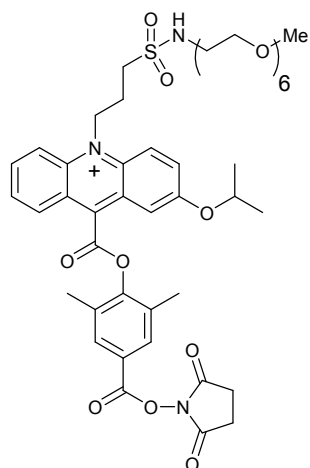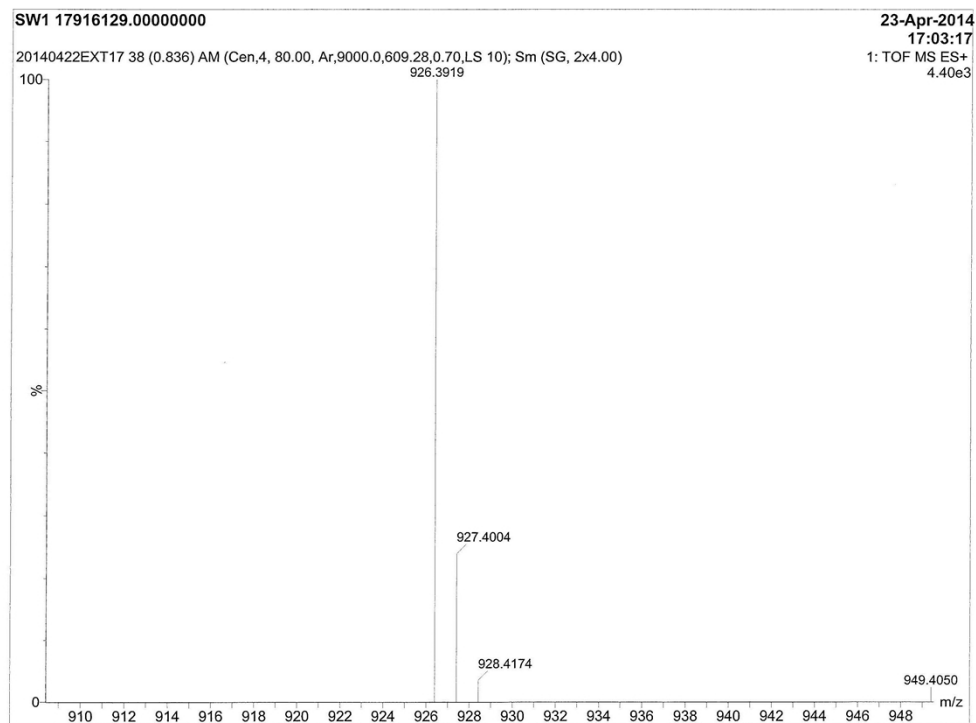

Figure S13c. HRMS of compound 5b.

Chemiluminescence emission spectra of acridinium ester labels **1a-6a**

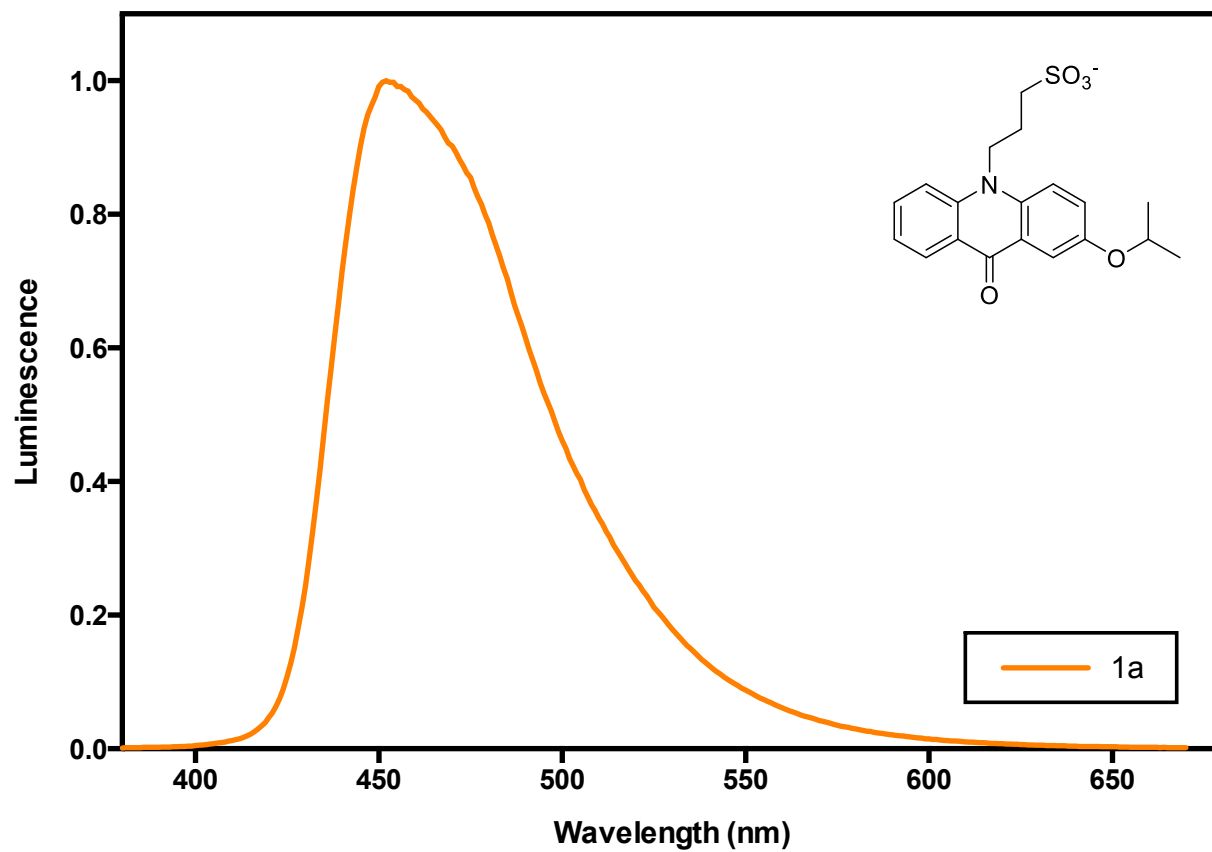

**Figure S14a.** Chemiluminescence emission spectrum of compound **1a**.

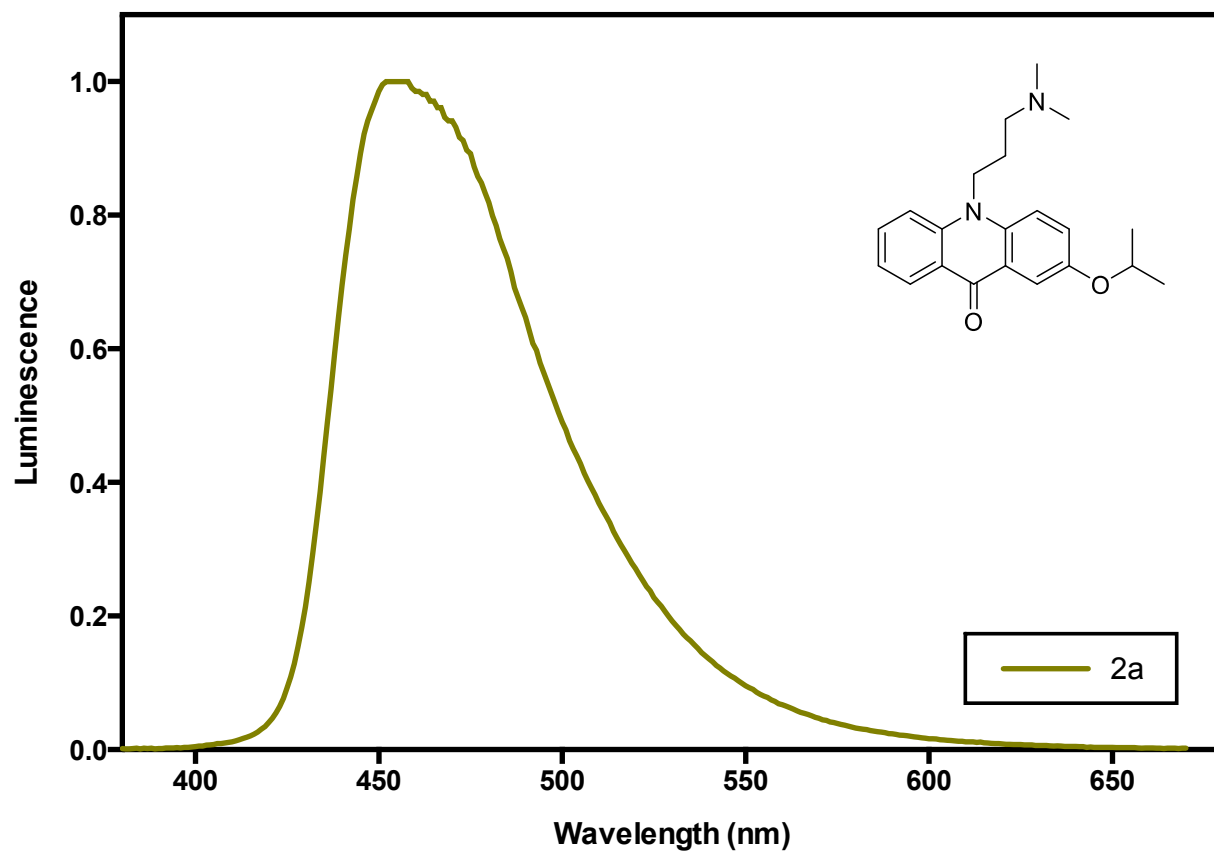

Figure S14b. Chemiluminescence emission spectrum of compound 2a.

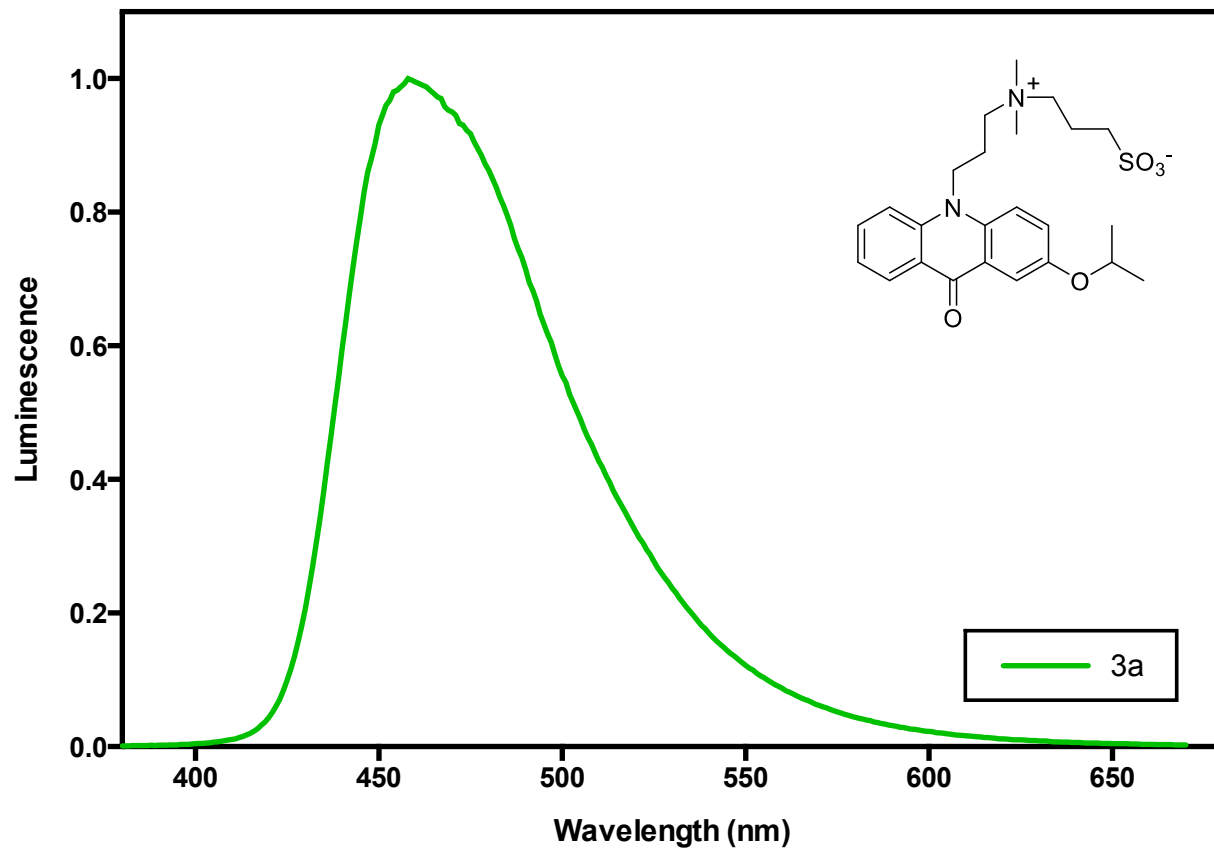

**Figure S14c.** Chemiluminescence emission spectrum of compound **3a**.

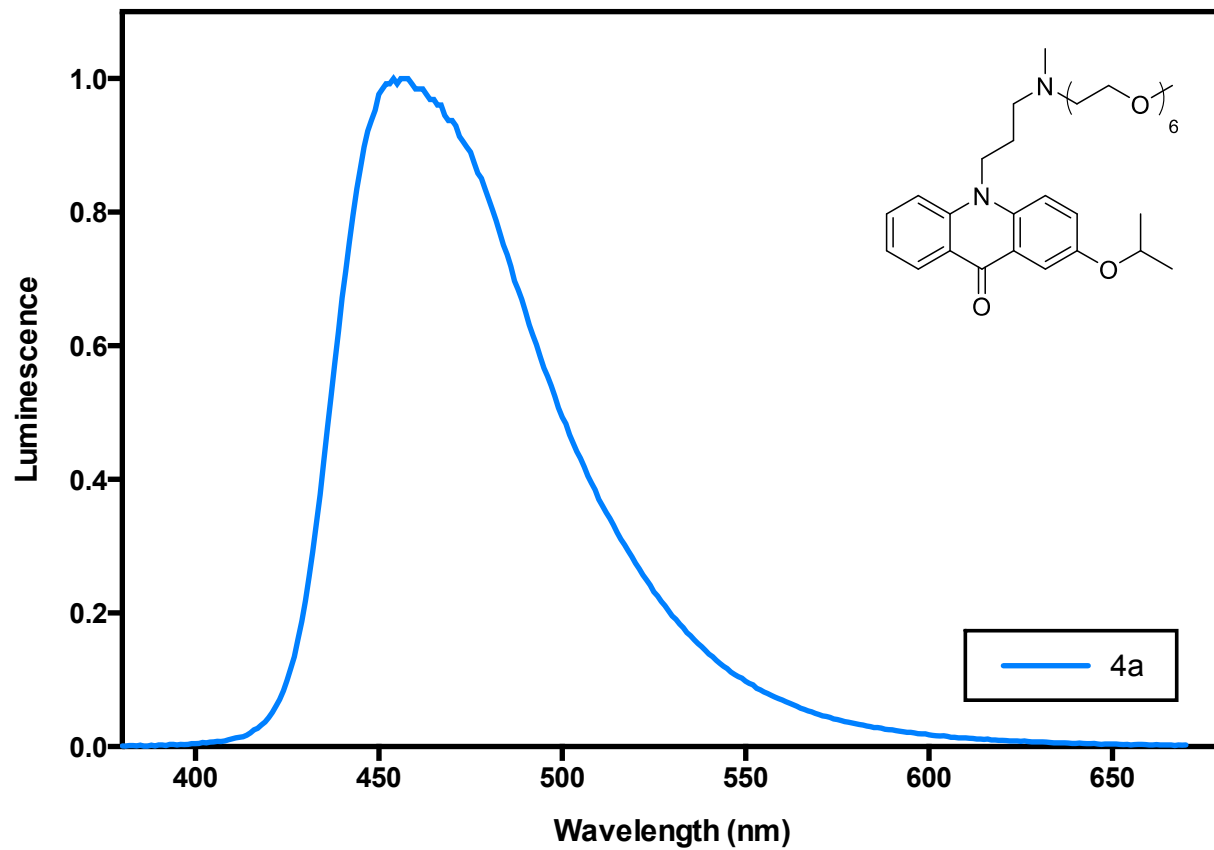

Figure S14d. Chemiluminescence emission spectrum of compound 4a.

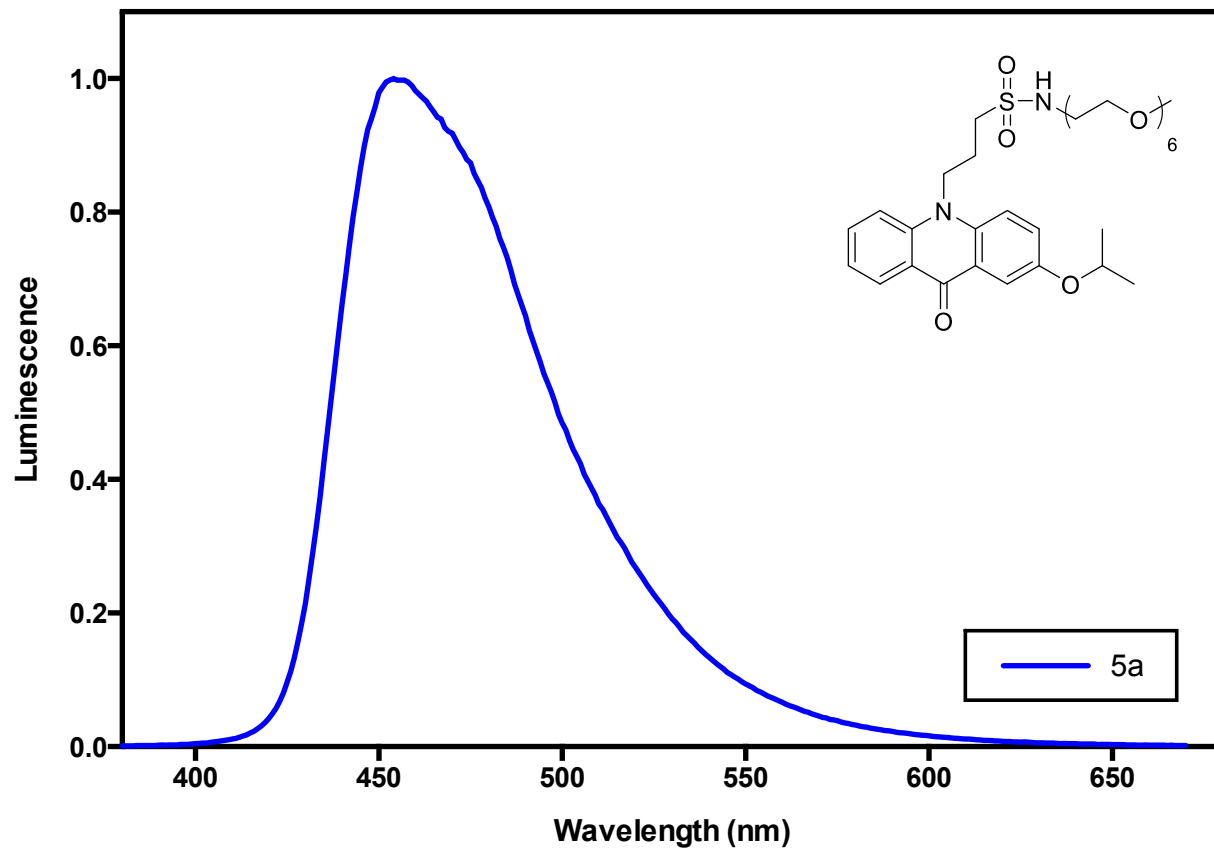

Figure S14e. Chemiluminescence emission spectrum of compound 5a.

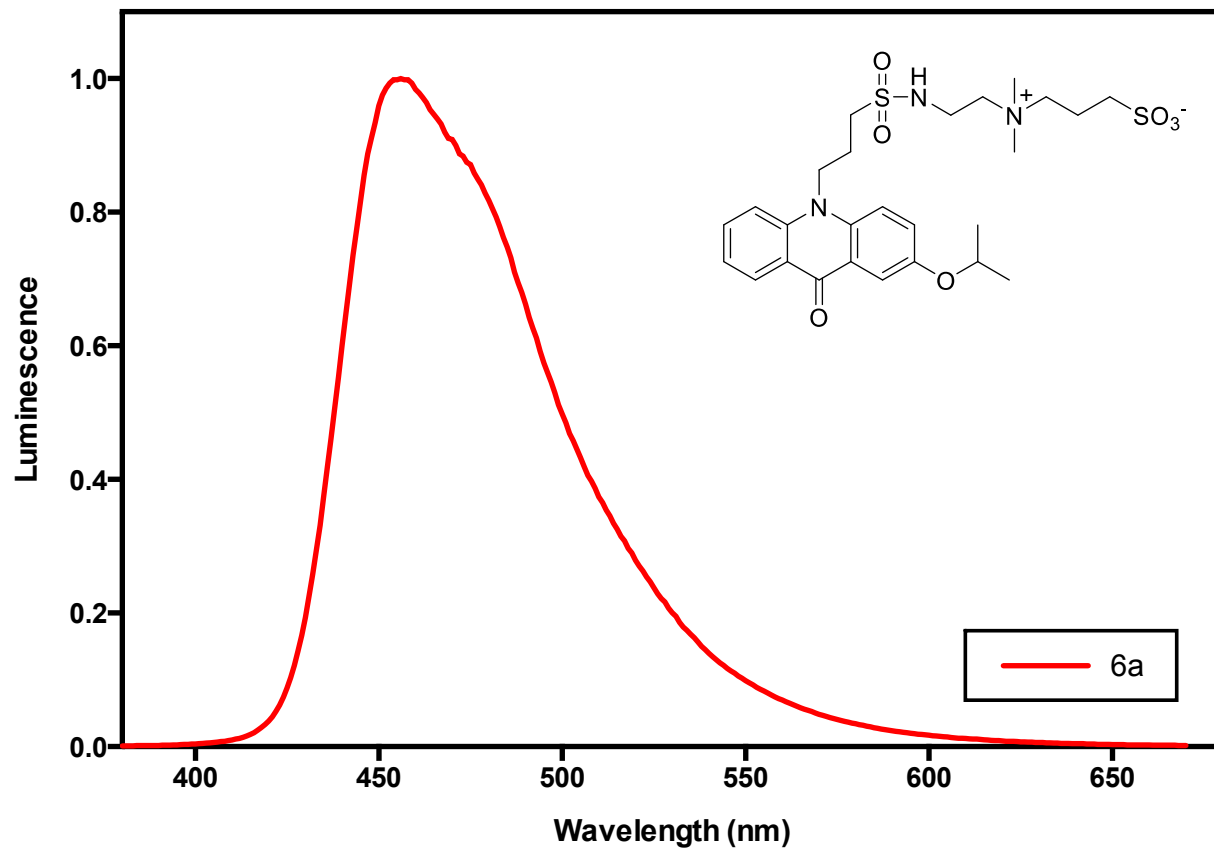

Figure S14f. Chemiluminescence emission of compound 6a.

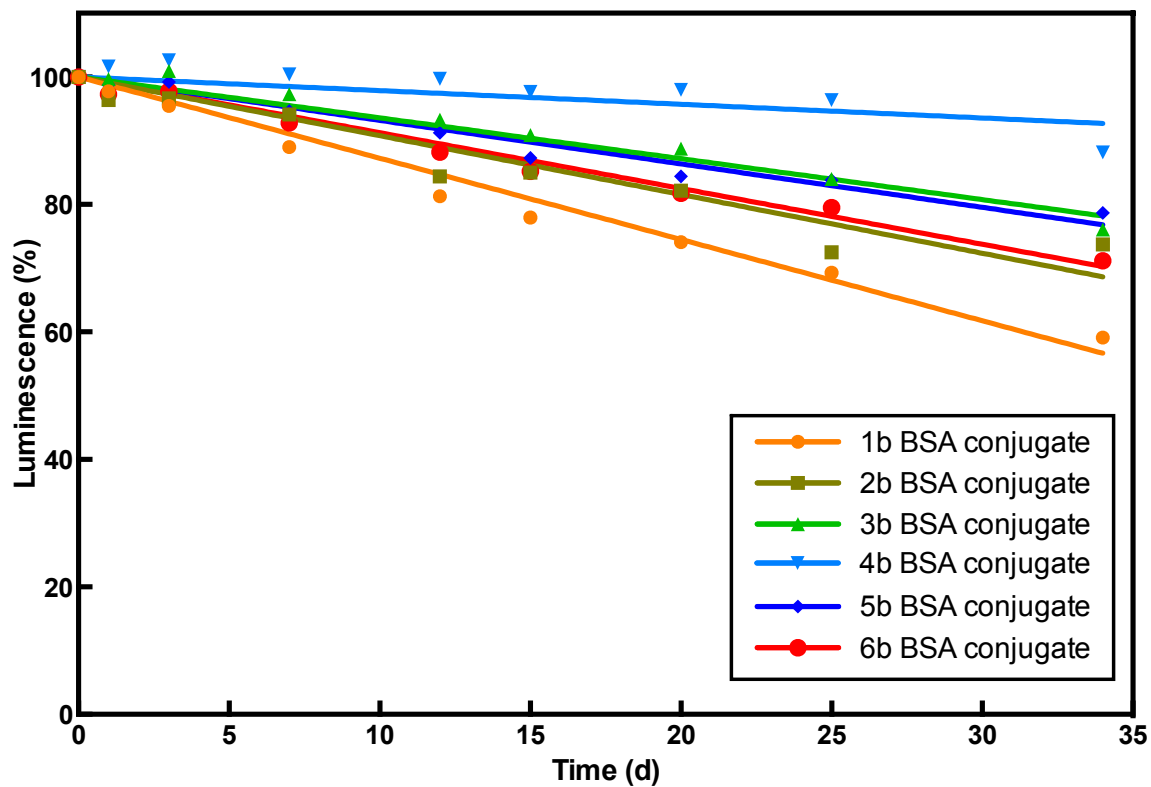

**Figure S15.** Chemiluminescence stability of BSA conjugates of labels **1b-6b** at 37°C in pH 7.4 phosphate buffer. Compared to the reference compound **1b** with an N-sulfopropyl group, better chemiluminescence stability was observed with bulkier N-alkyl groups.



**Table S1.** fNSB measurements of acridinium ester labels **1a-6a** to 4 particles.

| Label     | M-270 (amino surface) | M-270 (carboxylate surface) | M-280 (hydrophobic surface) | PMP (amino surface)  |
|-----------|-----------------------|-----------------------------|-----------------------------|----------------------|
| <b>1a</b> | $7.9 \times 10^{-4}$  | $1.3 \times 10^{-6}$        | $6.6 \times 10^{-5}$        | $1.9 \times 10^{-4}$ |
| <b>2a</b> | $3.0 \times 10^{-4}$  | $9.1 \times 10^{-6}$        | $9.4 \times 10^{-5}$        | $4.4 \times 10^{-5}$ |
| <b>3a</b> | $7.4 \times 10^{-5}$  | $8.6 \times 10^{-7}$        | $3.3 \times 10^{-5}$        | $4.9 \times 10^{-5}$ |
| <b>4a</b> | $2.6 \times 10^{-4}$  | $3.4 \times 10^{-6}$        | $8.5 \times 10^{-5}$        | $2.2 \times 10^{-5}$ |
| <b>5a</b> | $2.0 \times 10^{-3}$  | $4.8 \times 10^{-6}$        | $4.0 \times 10^{-4}$        | $7.3 \times 10^{-5}$ |
| <b>6a</b> | $1.2 \times 10^{-4}$  | $1.4 \times 10^{-6}$        | $5.8 \times 10^{-5}$        | $7.4 \times 10^{-5}$ |

**Table S2.** fNSB measurements of BSA conjugates of **1b-6b** to 4 particles.

| BSA conjugates | M-270 (amino surface) | M-270 (carboxylate surface) | M-280 (hydrophobic surface) | PMP (amino surface)  |
|----------------|-----------------------|-----------------------------|-----------------------------|----------------------|
| 1b conjugate   | $5.0 \times 10^{-5}$  | $1.9 \times 10^{-6}$        | $2.4 \times 10^{-5}$        | $5.1 \times 10^{-5}$ |
| 2b conjugate   | $4.8 \times 10^{-5}$  | $6.3 \times 10^{-6}$        | $2.7 \times 10^{-4}$        | $2.8 \times 10^{-5}$ |
| 3b conjugate   | $1.2 \times 10^{-5}$  | $1.9 \times 10^{-6}$        | $9.3 \times 10^{-5}$        | $1.8 \times 10^{-5}$ |
| 4b conjugate   | $3.5 \times 10^{-5}$  | $4.9 \times 10^{-6}$        | $4.9 \times 10^{-4}$        | $1.7 \times 10^{-5}$ |
| 5b conjugate   | $1.6 \times 10^{-4}$  | $2.8 \times 10^{-6}$        | $4.2 \times 10^{-4}$        | $2.5 \times 10^{-5}$ |
| 6b conjugate   | $2.3 \times 10^{-5}$  | $1.7 \times 10^{-6}$        | $1.1 \times 10^{-4}$        | $2.6 \times 10^{-5}$ |
